1 **Four decades of phenology in an alpine amphibian: trends, stasis, and climatic**  
2 **drivers**

3 Omar Lenzi<sup>1</sup>, Kurt Grossenbacher<sup>2</sup>, Silvia Zumbach<sup>3</sup>, Beatrice Lüscher<sup>4</sup>, Sarah Althaus<sup>4</sup>,  
4 Daniela Schmocker<sup>5</sup>, Helmut Recher<sup>6</sup>, Marco Thoma<sup>7</sup>, Arpat Ozgul<sup>1</sup>, Benedikt R. Schmidt<sup>1,3</sup>

5 <sup>1</sup>Department of Evolutionary Biology and Environmental Studies, University of Zurich,  
6 Winterthurerstrasse 190, 8057 Zurich, Switzerland

7 <sup>2</sup>Eichholzstrasse 18F, 3027 Bern, Switzerland

8 <sup>3</sup>Info Fauna Karch, Bellevaux 51, 2000 Neuchâtel, Switzerland

9 <sup>4</sup>Schwand 3, 3110 Münsingen, Switzerland

10 <sup>5</sup>Impuls AG, Seestrasse 2, 3600 Thun, Switzerland

11 <sup>6</sup>Abteilung Biodiversität und Landschaft, Bundesamt für Umwelt, Worblentalstrasse 68, 3063  
12 Ittigen, Switzerland

13 <sup>7</sup>Wylerringstrasse 1, 3014 Bern, Switzerland

14

15 Corresponding author's email address: [omar.lenzi@ieu.uzh.ch](mailto:omar.lenzi@ieu.uzh.ch)

16

17 ORCID: OL, 0000-0003-1938-6786

18 MT, 0000-0003-2729-2376

19 AO, 0000-0001-7477-2642

20 BRS, 0000-0002-4023-1001

21

22 Word count (abstract through acknowledgements): 7'603

23 Number of citations: 94

24 Number of tables in main document: 3

25 Number of figures in main document: 3

26        **Abstract**

27        1. Strong phenological shifts in response to changes in climatic conditions have  
28                been reported for many species, including amphibians, which are expected to  
29                breed earlier. Phenological shifts in breeding are observed in a wide number  
30                of amphibian populations, but less is known about populations living at high  
31                elevations, which are predicted to be more sensitive to climate change than  
32                lowland populations.

33

34        2. The goal of this study is to assess the main factors determining the timing of  
35                breeding in an alpine population of the common toad (*Bufo bufo*) and to  
36                describe the observed shifts in its breeding phenology.

37

38        3. We modelled the effect of environmental variables on the start and peak dates  
39                of the breeding season using 39 years of individual-based data. In addition,  
40                we investigated the effect of the lunar cycle, as well as the individual variation  
41                in breeding phenology. Finally, to assess the individual heterogeneity in the  
42                timing of breeding, we calculated the repeatability of the timing of arrival at the  
43                breeding site.

44

45        4. Breeding advanced to earlier dates in the first years of the study but the trend  
46                continued only until the mid 1990s, and stabilised afterwards. Overall, toads  
47                are now breeding on average around 30 days earlier than at the start of the  
48                study period. High temperatures and low snow cover in winter and spring, as  
49                well as reduced spring precipitation were all associated with earlier breeding.  
50                Additionally, we found evidence of males arriving on average before females

51 at the breeding site but no clear and strong effect of the lunar cycle. We only  
52 found weak evidence of among-individual variation in shifts in the breeding  
53 phenology, as well as a low repeatability of arrival timing.

54

55 5. Our findings show that the observed changes in breeding phenology are  
56 strongly associated with the environmental conditions. These results  
57 contribute to filling a knowledge gap on the effects of climate change on  
58 alpine amphibian populations. Moreover, we show that changes in phenology,  
59 especially in the mountains, can be hard to predict as local microclimatic  
60 conditions do not necessarily reflect the observed global climatic trends.

61

62 **Keywords:** Phenology, climate change, *Bufo bufo*, mountains, principal component  
63 analysis, repeatability

## 64 **Introduction**

65

66 Phenology refers to the timing of periodical events (e.g., seasonal migration, spring  
67 flowering) in relation to biotic and abiotic factors, and is a key element of the life

68 cycle in a multitude of organisms. Phenology is normally determined by a

69 combination of a genetic and an environmental component (Quinn & Wetherington,

70 2002; Tang et al., 2016). Thus, climate change can shift the phenology of many

71 species, potentially leading to mismatches between demand and availability of

72 resources (Parmesan & Yohe, 2003; Visser & Gienapp, 2019; Iler et al., 2021).

73 These shifts can have large effects on the demography of populations, as individuals

74 cannot benefit from the optimal conditions at the right time, with consequences on

75 their fitness (Visser & Gienapp, 2019; Iler et al., 2021). Therefore, it is important to

76 describe and quantify phenological shifts and their causes.

77 Phenology has a key role in amphibians as well, especially in species living in

78 temperate regions, where various aspects of the annual cycle are determined by

79 seasonality (Duellman & Trueb, 1986; Gotthard, 2001; Hartel et al., 2007). The

80 environmental component is more important than the genetic component in

81 explosive breeders (*sensu* Wells, 1977). In fact, explosive breeders reproduce once

82 a year around springtime and the timing is linked to specific environmental signals

83 such as increasing day length, temperature, and rainfall, which can trigger the

84 migration of amphibians from the hibernation sites to the breeding ponds (Semlitsch,

85 1985; Oseen & Wassersug, 2002; While & Uller, 2014; Ficetola & Maiorano, 2016).

86 Other important environmental factors affecting the timing of breeding in explosive

87 breeders can be the lunar cycle (Grant et al., 2009; Green et al., 2016; Arnfield et al.,

88 2012; Jarvis et al., 2021) or the hydrological cycle of breeding ponds (Semlitsch et

89 al., 1993). Previous studies have also identified a possible genetic component in  
90 triggering the migration to the breeding site and thus the start of the breeding season  
91 (Heusser & Ott, 1968; Semlitsch et al., 1993; Phillimore et al., 2010). Breeding  
92 phenology also shows individual variation, as the animals will arrive at different times  
93 at the breeding site. The causes of individual-level variation are multifold and can  
94 include genetics (Heusser & Ott, 1968; Semlitsch et al., 1993), sex and size (Loman  
95 & Madsen, 1986), body condition (Kokko, 1999) as well as features of the  
96 hibernation site, such as distance from the breeding site, which in *Bufo bufo* can be  
97 up to more than 1000 m (Sztatecsny & Schabetsberger, 2005; Kovar et al., 2009).

98         While most studies on amphibians across species and locations have found  
99 earlier spring breeding in response to climate change (Beebee, 1995; Blaustein et  
100 al., 2001; Parmesan, 2007; While & Uller, 2014), phenological delays have also been  
101 observed (e.g., Arnfield et al., 2012; Arietta et al., 2020). In other cases, non-linear  
102 responses to environmental drivers such as the North Atlantic Oscillation were  
103 observed (Prodon et al., 2020). The direction and magnitude of phenological shifts  
104 are therefore variable among and within species, as they can depend on the specific  
105 environmental conditions that the populations are experiencing at the local scale, or  
106 on the genetic structure of said populations (Phillimore et al., 2010; Bison et al.,  
107 2021).

108         Shifts in phenology can have adverse effects on amphibians, as phenological  
109 mismatches can affect predator-prey dynamics and food availability (Todd et al.,  
110 2011; Reinhardt et al., 2015; Jara et al., 2019; Visser & Gienapp, 2019). In  
111 temperate regions, early breeding can expose eggs and hatched tadpoles more  
112 frequently to late frost events, thus increasing mortality (Muir et al., 2014; Bison et  
113 al., 2021). On the other hand, in the absence of frost or drying events, earlier

114 breeding might be beneficial as it allows post-metamorphic toadlets more time to  
115 fully develop in summer before hibernation (Reading & Clarke, 1999; Reading,  
116 2010). Delayed breeding can also have a negative outcome on the population, as it  
117 can result in increased mortality in juveniles that could not fully grow before their first  
118 hibernation (Morin et al., 1990; Garner et al., 2011; Sinsch & Schäfer, 2016). Even  
119 though this phenomenon can be compensated in some cases with an accelerated  
120 growth rate, this can come at the cost of reduced defences against predation  
121 (Orizaola et al., 2016). Thus, phenological shifts and their causes should be  
122 identified and better understood, as they can help design and prioritise conservation  
123 and management actions.

124         The consequences of phenological shifts could be exacerbated in ecosystems  
125 less resilient to climate change. Mountains are among the most threatened  
126 ecosystems (Thompson, 2000; Diaz et al., 2003, but see Körner & Hiltbrunner, 2021)  
127 and are predicted to warm more rapidly in the northern hemisphere (Nogués-Bravo  
128 et al., 2007; Keiler et al., 2010; Vitasse et al., 2021). The phenology of plant and  
129 animal populations at high elevations is shifting on average towards earlier dates  
130 (Vitasse et al., 2021). Long-term studies on amphibian populations living at high  
131 elevations are scarce, and not much is known about how their breeding phenology is  
132 changing. These populations experience different environmental conditions (e.g.,  
133 increased amount of snow and colder temperatures) compared to their lowland  
134 counterparts. Thus, different environmental variables potentially play a bigger role in  
135 determining breeding phenology compared to what is observed at lower elevations  
136 (Nufio et al., 2010; Bison et al., 2020).

137         Using 39 years of data on an explosive-breeding amphibian population living  
138 at a high elevation (*B. bufo*), we study the relationship between breeding phenology

139 and the environment. More specifically, our goal is to (i) identify the environmental  
140 variables (e.g., temperature, snow cover, moon cycle) that could be driving the  
141 observed breeding phenology of this population (both the start and the peak of the  
142 breeding season), (ii) analyse if there is significant variation in the phenological shifts  
143 among individuals, (iii) obtain a measure of individual heterogeneity, by calculating  
144 individual-level repeatability (i.e., upper limit of heritability; Falconer, 1981; Lessells &  
145 Boag, 1987; Semlitsch et al., 1993) of the timing of arrival at the breeding site for  
146 both males and females.

## 147 **Material and Methods**

### 148 ***Life-history data***

149

150 The study site is a pond located above Grindelwald, below the Grosse Scheidegg  
151 mountain pass (canton of Bern, Switzerland, 46.65240 N, 8.09683 E), at an elevation  
152 of 1841 m a.s.l. The pond measures approximately 10 m x 30 m, with a maximum  
153 depth of about 1 m. Since 1982, we have captured annually all the toads that come  
154 to breed at the study pond. We then marked (first by toe-clipping, then starting in  
155 1993 by implanting PIT tags), measured, and released them in the same place  
156 (Hemelaar, 1988; Grossenbacher, 2002). To make sure we captured both early and  
157 late arrivers, we repeated this procedure for on average 5–6 nights, with breaks in-  
158 between of about 2-4 days (i.e, the data conform to Pollock's (1982) robust design).  
159 The length of the fieldwork period usually covers the breeding season duration,  
160 which typically lasts about two weeks at our study pond. This design also had the  
161 advantage of not overly stressing the toads. In total, for the period 1982–2020, 3053  
162 uniquely recognizable individuals have been caught, of which 1852 were males and  
163 1201 females. For each individual we have a record of presence for each capture  
164 night over the study period. Given the reduced size of the pond and the repeated  
165 capture rounds within a capture night, we assumed high capture probabilities  
166 (capture probability  $p \approx 0.85$  per year based on a preliminary analysis of the mark-  
167 recapture data). At the population level we determined for each year a start, a peak,  
168 and an end date of breeding (i.e., first capture night, the capture night when most  
169 toads were captured, and last capture night, respectively). These calendar dates  
170 were all transformed into days of the year (where January 1st = 1), to facilitate



171 modelling of long-term trends. These dates come with a degree of uncertainty, given  
172 the sampling done every 2–4 days and not daily. The date of start of the breeding  
173 comes with additional uncertainty as the first capture night is not always reflective of  
174 the same toad activity at the pond over the study period. We accounted for these  
175 sources of uncertainty in all following analyses, using simulated data on start and  
176 peak breeding dates.

177

### 178 ***Climatic data***

179

180 We obtained climatic data for the period 1980–2020 from the DaymetCH dataset  
181 (data obtained from *Bioclimatic maps of Switzerland* © WSL, based on station data  
182 from the Federal Office of Meteorology and Climatology MeteoSwiss, and elaborated  
183 by the *Land Change Science group*, WSL). This dataset consists of a 100-metre  
184 resolution grid of interpolated estimates of weather variables, using meteorological  
185 data from ground stations and the Daymet software (Thornton et al., 1997). We  
186 obtained data for the cell containing the breeding pond for the following variables:  
187 daily minimum, maximum, and mean temperature, daily total precipitation, and daily  
188 snow water equivalent (SWE; the equivalent amount of water stored in the  
189 snowpack). We then calculated average seasonal minimum, maximum, and mean  
190 daily temperatures, and cumulative seasonal precipitation and SWE.

191 **Data analysis**

192

193 *Population trend*

194

195 A visual inspection of the data suggests that the trends in the breeding phenology  
196 across the study period are non-linear, both for start and peak breeding (Figure 1).  
197 Therefore, to better describe the observed trends, we conducted a piecewise  
198 regression on both start and peak breeding using the R package *segmented*  
199 (Muggeo, 2008). This analysis enables the identification of possible breakpoints in a  
200 trend, in our case a year (or several years) when a significant change occurs in the  
201 temporal trends of the breeding phenology. We set the year 1982 as year 0 in the  
202 model, to obtain a more intuitive interpretation of the intercept. Moreover, we decided  
203 to assess the robustness of our analysis to possible imperfect assignment of start  
204 and peak dates, as the toad sampling is not done daily. To do this, we simulated  
205 1000 datasets of breeding start dates over the study period, allowing the date of the  
206 start of the breeding to be as early as seven days before the originally assigned first  
207 capture night. The process was described by a uniform distribution, where each date  
208 between 0 and 7 days earlier than the assigned date had the same probability of  
209 being chosen. We also simulated 1000 datasets for peak breeding dates, allowing  
210 the dates to deviate from the originally assigned date by letting it vary between the  
211 previous and the following capture night, again with the dates being picked from an  
212 uniform distribution. Using these simulated datasets, we ran 1000 piecewise  
213 regressions for both start and peak breeding dates, and calculated the 2.5<sup>th</sup> and the  
214 97.5<sup>th</sup> percentiles of the values of each model parameter, including p-values testing  
215 for the significance of the breakpoint.

216           Moreover, to check how the standard deviation (SD) of the start or the peak  
217 breeding dates changes over time, we calculated for both start and peak breeding  
218 the SD of the residuals of each of the 1000 piecewise regressions, using a rolling  
219 window approach (with a 10-year window) with the function *rollapply* of the package  
220 *zoo* (Zeileis & Grothendieck, 2005).

221 *Determinants of variation in the breeding phenology in the population*

222

223 To understand the climatic causes of the observed shifts in the breeding phenology  
224 of this population, we investigated the effects of several climatic variables on the  
225 timing of breeding at the population level. We identified *a priori* the climatic  
226 covariates that most reasonably could influence the breeding phenology in spring  
227 based on previous literature and expert knowledge (Oseen & Wassersug, 2002;  
228 Reading, 2003; While & Uller, 2014; Ficetola & Maiorano, 2016; Green, 2017).

229 These climatic covariates are: average minimum daily temperature in spring ( $T_{Sp}$ )  
230 and winter ( $T_w$ ), total precipitation in spring ( $Prec_{Sp}$ , which includes both rainfall and  
231 snowfall), total snow water equivalent in spring ( $SWE_{Sp}$ ), and winter ( $SWE_w$ ). We  
232 then performed a piecewise regression on the time series of these five climatic  
233 covariates (Figure 2, Table S4). We used minimum temperatures because toads are  
234 nocturnal animals and are therefore more exposed to colder temperatures and less  
235 to average or warmer temperatures. Moreover, minimum temperatures will  
236 determine if the ground stays above freezing conditions. Changing the temperature  
237 variable (mean vs minimum vs maximum) in the subsequent analyses did not  
238 change the results as they were highly correlated ( $r > 0.93$ ).

239 With warmer winters and springs, toads should emerge sooner from their  
240 hibernation burrows as the snow will melt and the ground unfreeze earlier (Corn,  
241 2003). The higher the snow water equivalent, the later the toads will emerge, as the  
242 snow cover will keep them blocked underground (Corn, 2003). Finally, precipitation  
243 can either favour or delay the breeding season. Snowfall should delay breeding as  
244 the snow cover will increase (Corn, 2003), but rainfall could potentially lead to an  
245 earlier start of the breeding season, as toads need high humidity levels to be active

246 (Todd et al., 2011; Green, 2017). After standardising these climatic variables by  
247 subtracting the mean value and dividing by the standard deviation, we performed a  
248 principal component analysis (PCA, function *prcomp*, R package *stats* (R Core  
249 Team, 2020)), to reduce dimensionality and obtain uncorrelated variables (Figure  
250 S1).

251 In addition to these five climatic variables, the lunar cycle has also been  
252 identified to be an important factor for the timing of breeding in amphibians, with in  
253 general peak migration to the breeding site under waxing or full moon phases (Grant  
254 et al., 2009; Arnfield et al., 2012; Green et al., 2016; Jarvis et al., 2021). To assess  
255 the effect of the lunar cycle on the breeding phenology in our population, we first  
256 obtained the moon phase for each date of breeding start and peak breeding over the  
257 study period using the package *lunar* (Lazaridis, 2014). Following Arnfield et al.  
258 (2012) and Jarvis et al. (2021), we transformed the lunar phases in lunar angles (in  
259 radians, where 0 = new moon and  $\pi$  = full moon).

260 To quantify both the effects of climate and of the moon cycle on the breeding  
261 phenology, we modelled two separate linear regressions on the day of the breeding  
262 start and the day of peak breeding over the period 1982–2020. As explanatory  
263 variables we used the scores of the first two principal components (PC), as they  
264 explained an important amount of the variance in the data (>70%). As an additional  
265 explanatory variable, to better understand the role of the moon cycle, we included  
266 the cosine of the lunar angles of the start and peak breeding dates respectively. We  
267 first modelled the originally assigned dates, and then, as we did for the piecewise  
268 regression, we ran 1000 models with simulated datasets with varying dates of start  
269 and peak breeding, drawn from a uniform distribution. Each date could vary to be  
270 any date between the previous and following capture night.

271 To further study the association between the moon cycle and breeding  
272 phenology we tested if start and peak breeding tended to happen more frequently  
273 under certain moon phases. To do this, we used the *rayleigh.test* function of the  
274 *circular* R package (Agostinelli & Lund, 2017) to perform the Rayleigh test, a circular  
275 goodness-of-fit test that is particularly suited for checking if the values of a circular  
276 variable show a unimodal departure from a uniform distribution (Landler et al., 2018).  
277 To check for significant multimodal departures we performed the Hermans-Rasson  
278 test instead, using the *HR\_test* from the *CircMLE* package (Fitak & Johnsen, 2017;  
279 Landler et al., 2018). Both tests were performed on the values in radians of the lunar  
280 angles. Also in this case we first ran the tests on the originally assigned dates and  
281 then we ran them on 1000 simulated datasets of start and peak breeding dates and  
282 obtained the 2.5<sup>th</sup> and 97.5<sup>th</sup> percentile of the p-values.

283

#### 284 *Determinants of individual variation in breeding phenology*

285

286 In addition to considering phenology at the population level, we also wanted to  
287 understand whether individuals can show different patterns of changes in their  
288 reproductive phenology over time through different responses to climatic variables,  
289 possibly indicating a genetic component that mediates the effect of the changing  
290 environment. We therefore modelled the effect of the previously used principal  
291 components PC1 and PC2, as well as of the cosine of the lunar angle on each  
292 individual first capture occasion in any given year (6735 occurrences for 3053  
293 uniquely marked individuals, as many individuals were breeding in multiple years  
294 (mean = 2.21 years, SE = 0.02)), using a linear mixed model (package *lmerTest*,  
295 Kuznetsova et al., 2017). Also in this case, we first ran the model on the originally

296 assigned arrival dates, and then, to account for uncertainty in the assignment of the  
297 dates of arrival to the pond we simulated 1000 new datasets where every individual  
298 arrival date is newly sampled from a uniform distribution and can be as early as the  
299 capture night preceding the original arrival date, or if it was the first capture night of  
300 the season, up to seven days before. Using these 1000 new datasets we ran 1000  
301 models and obtained the 2.5<sup>th</sup> and the 97.5<sup>th</sup> percentile values for each parameter.  
302 As a random effect, applied on both the intercept and the slope of both PC1 and  
303 PC2, we included individual identity (ID). This was done not only to observe if  
304 individuals react differently to changing environmental conditions, but also to account  
305 for the non-independence of the data. Moreover, we also included *year* as a random  
306 effect on the intercept, to account for unexplained year-specific variation in the data.  
307 Finally, we included the effect of sex to account for differences between males and  
308 female. To properly be able to compare the effects of continuous variables (i.e., the  
309 two PCs and the cosine of the lunar angles) with the effect of a categorical variable  
310 (i.e., sex), we standardised the three continuous variables by subtracting the mean  
311 and dividing by two times the standard deviation (Gelman, 2008). Finally, as a  
312 measure of model fit, we calculated the conditional  $R^2$  value using the  
313 *r.squaredGLMM* function from the package *MuMIn* (Barton, 2019).

314

### 315 *Repeatability of arrival date*

316

317 Finally, we also estimated repeatability (i.e., the upper limit of heritability) of arrival  
318 dates at the breeding site. High values of repeatability ( $r$ ) mean that individuals are  
319 consistent in their relative arrival timing (e.g., always among the first ones), and vice  
320 versa. To calculate  $r$ , we used for each individual the date of first capture for each

321 year that it was captured. This date is a relatively good proxy for the date of arrival at  
322 the breeding site, as the data collection usually starts every year approximately when  
323 the first toads arrive at the pond. The date was converted to the day of the year  
324 (where January 1st = 1), and then standardised by subtracting the year-specific  
325 mean and dividing by the year-specific standard deviation. We then used the  
326 function *rpt* from the package *rptR* to calculate *r* using individual ID as the group  
327 variable (Stoffel et al., 2017), and bootstrapping 1000 times to obtain the 95% CI.  
328 As for all the other analyses, to account for the uncertainty in the assignment of the  
329 dates, we repeated the calculation of *r* 1000 times, sampling different arrival dates  
330 every time from a uniform distribution, where the arrival date of each individual can  
331 be up to the previous capture night, or up to seven days earlier if they were caught  
332 during the first capture night of the season. We then calculated the 2.5<sup>th</sup> and the  
333 97.5<sup>th</sup> percentiles of *r* to show the spread it can have. Given the different  
334 reproductive strategies that males and females toads have, with females on average  
335 coming to the breeding site later than males and for a shorter period of time  
336 (Reading & Clarke, 1983; Loman & Madsen, 1986), we performed sex-specific  
337 calculations of *r*.

338

339 We conducted all the analyses in R (R version 4.1.1; R Core Team, 2020) with  
340 RStudio (version 2022.7.1.554; R Studio Team, 2022).



## 341 **Results**

342

### 343 ***Population trend***

344

345 Both the breeding start dates and the dates of peak breeding show very similar  
346 trends (Pearson's correlation coefficient = 0.91), with both also showing marked  
347 between-year variation over the study period. Nonetheless, a shift towards earlier  
348 breeding dates is observable, with breeding happening now on average around 30  
349 days earlier compared to the start of the study period (Figure 1). The piecewise  
350 regression on breeding start dates identified a single breakpoint in the temporal trend  
351 in the year 1993 with a pre-1993 steep advancement of breeding dates followed by a  
352 post-1993 almost flat trend (Figure 1A; Table 1). The analysis of the robustness of  
353 the piecewise regression, done by simulating data and running 1000 piecewise  
354 regressions, performed very similarly, with 910 cases out of 1000 where the year  
355 1993 was identified as breakpoint and the model coefficients were very close to the  
356 piecewise regression conducted on the originally assigned breeding dates (Table  
357 S1). The piecewise regression on peak breeding dates also identified 1993 as a  
358 breakpoint year (Figure 1B; Table 1). In this case, the analysis of the robustness  
359 showed slightly more variation, with the breakpoint years mostly obtained being 1993  
360 and 1996 (274 and 283 out of 1000 respectively) (Table S1). Moreover, we found the  
361 standard deviation (SD) of the residuals of the piecewise regressions on both start  
362 and peak breeding dates to vary considerably, with higher SDs at the start and the  
363 end of the study period (Figure S2). To further check the pattern in the residuals we  
364 split them in four different decades and checked their distribution (Figure S3).

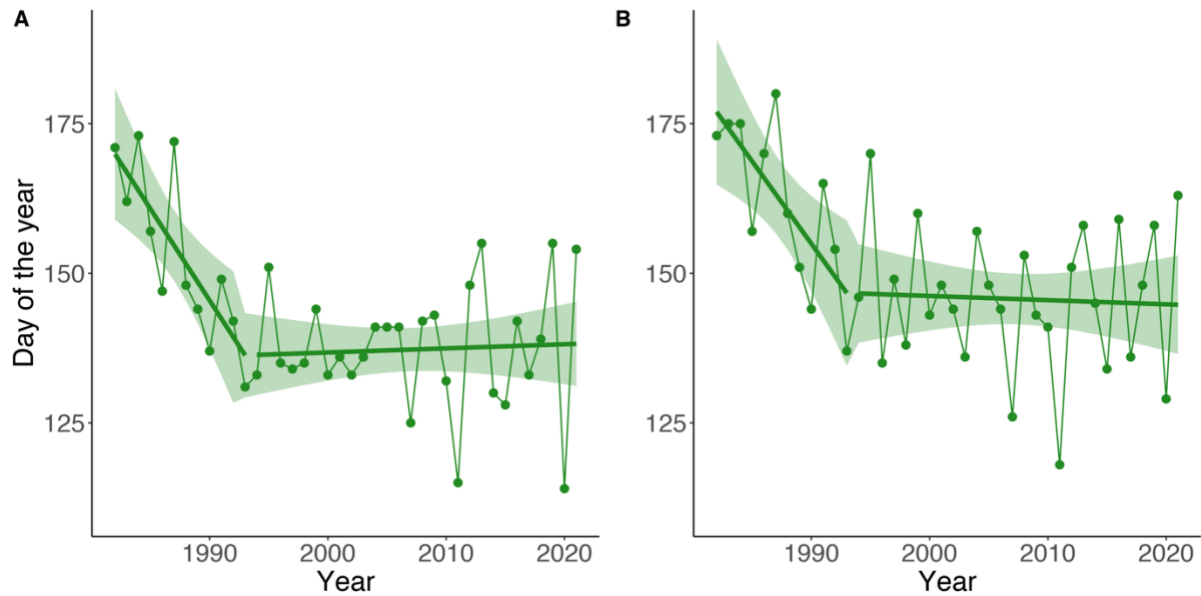

365

366

367 **Figure 1.** Trends of breeding phenology over the study period (1982–2021). **(A)** First day of

368 the breeding season (day of the year, where January 1st = 1). The segmented green line is

369 the result of a piecewise regression, where the year 1993 ( $\pm 5$ ; 95% CI) was identified as a

370 breakpoint, thus creating two distinct trends. **(B)** Date of peak breeding (i.e., date where

371 most toads were captured in a given breeding season). The segmented green line is the

372 result of a piecewise regression, where the year 1993 ( $\pm 6$ , 95% CI) was identified as a

373 breakpoint. The green band in both plots represents the 95% CI for the piecewise

374 regression.

**Table 1.** Summary of the piecewise regressions on the start and peak of the breeding season. For both intercept and slopes we show the estimate, its standard error, and the t-value and p-value associated with it. Slope1 refers to the segment before the breakpoint and Slope2 refers to the segment after the breakpoint. Asterisks next to the p-values show significance at the 0.05 level. The p-value for Slope2 is NA since standard asymptotics do not apply (Muggeo, 2008). No p-values are provided for the intercept because this test is not of biological interest.

|           | Estimates  | Std. Error | t-value | p-value |          |
|-----------|------------|------------|---------|---------|----------|
| Intercept | 169.92     | 5.60       | 30.32   | -       |          |
| Start     | Slope1     | -3.06      | 0.95    | -3.23   | 0.0027*  |
|           | Slope2     | 0.069      | 0.22    | 0.31    | NA       |
|           | Breakpoint | 1993       | 2.36    | -       | < 0.001* |
| Intercept | 176.96     | 6.19       | 28.57   | -       |          |
| Peak      | Slope1     | -2.75      | 0.95    | -2.89   | 0.0066*  |
|           | Slope2     | -0.07      | 0.27    | -0.26   | NA       |
|           | Breakpoint | 1993       | 2.84    | -       | 0.0023*  |

374

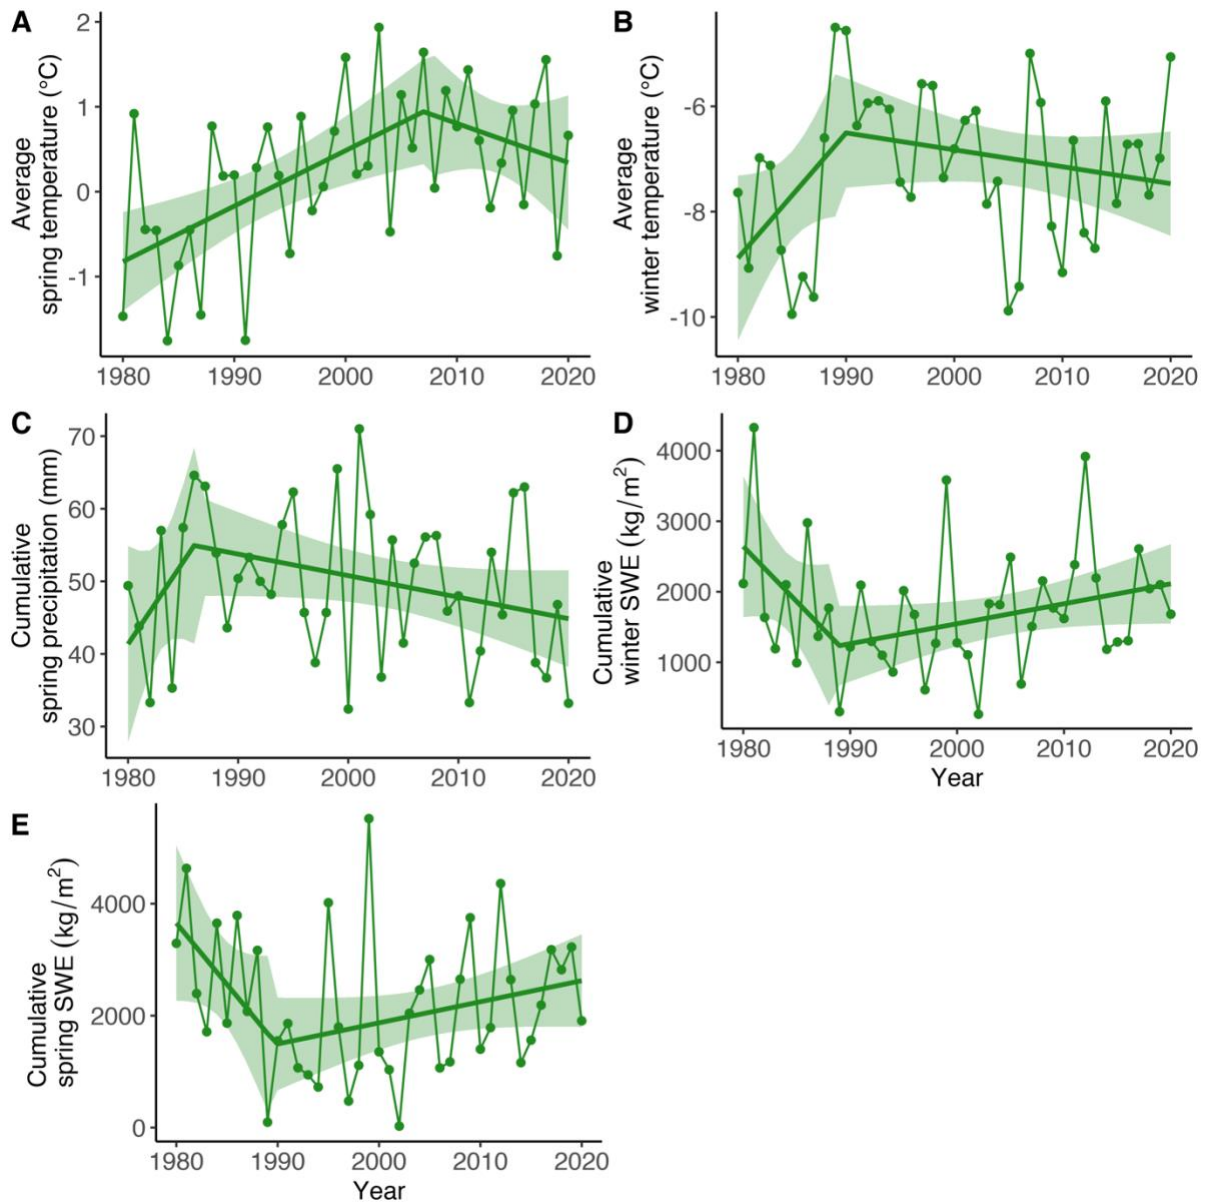

375  
376

377 **Figure 2.** Trends over the study period of the five focal environmental variables. **(A)** Average  
378 minimum daily temperature in spring. The piecewise regression identified the year 2007 ( $\pm 9$ ,  
379 95% CI) as a breakpoint. **(B)** Average minimum daily temperature in winter. The year 1990 ( $\pm$   
380 7, 95% CI) was a breakpoint. **(C)** Cumulative precipitation in spring. The year 1986 ( $\pm 8$ , 95%  
381 CI) was a breakpoint. **(D)** Cumulative snow water equivalent (SWE) in winter. The year 1989  
382 ( $\pm 7$ , 95% CI) was a breakpoint. **(E)** Cumulative SWE in Spring. The year 1990 ( $\pm 7$ , 95% CI)  
383 was a breakpoint. In all plots green ribbons represent the 95% CI for the linear regressions.  
384 Table S4 in the Appendix shows the summary of these five piecewise regressions.

385 ***Determinants of variation in the breeding phenology in the population***

386

387 The first two principal components (PC) of the principal component analysis (PCA)  
388 described together more than 70% of the variation in the data, and both had a  
389 standard deviation (i.e. the squared root of their eigenvalue) above one (Figure S1;  
390 Table S5). Therefore, applying the Kaiser rule, we kept the scores of these two PCs  
391 (PC1 and PC2) as explanatory variables in the following linear regressions on the  
392 start of the breeding season and on peak breeding (also including the scaled cosine  
393 of lunar angle). PC1 was mostly determined by winter temperature (+0.45 loading)  
394 and winter and spring SWE (-0.61 and -0.64, respectively). PC2 was mostly  
395 determined by spring weather conditions. Spring temperature had a negative loading  
396 (-0.68), while precipitation had a positive loading (+0.68) (Figure S1; Table S6).

397       Regarding the start of the breeding season, the model (adjusted  $R^2 = 0.41$ )  
398 indicated a significant negative relationship with PC1 and a significant positive  
399 relationship with PC2 (Table 2). The cosine of the lunar angle had a non-significant  
400 effect. Similarly, for the regression on the dates of peak breeding, we found a  
401 significant negative relationship with PC1 and a significant positive relationship with  
402 PC2, while the cosine of the lunar angle had a small and non-significant effect (Table  
403 2). The adjusted  $R^2$  was 0.54. In both cases the outcome is that warmer  
404 temperatures in winter and spring, less snow cover, and weaker precipitations are all  
405 associated with an earlier start and peak of the breeding season. Both the 1000  
406 linear regressions on the simulated dates of the start of the breeding season and the  
407 1000 on the simulated dates of peak breeding performed similarly to the two  
408 regressions on the originally assigned dates (Table S2), indicating that our analysis  
409 is robust to possible imperfect assignment of dates of start and peak breeding.

**Table 2.** Summary of the linear regression on the start and peak of the breeding season. For each variable we show the estimate, its standard error, and the t-value and p-value associated with it. Asterisks next to the p-value show significance at the 0.05 level. No p-values are provided for the intercept because this test is not of biological interest.

|           | Estimates | Std. Error | t-value | p-value |           |
|-----------|-----------|------------|---------|---------|-----------|
| Intercept | 141.72    | 1.65       | 85.92   | -       |           |
| Start     | PC1       | -5.48      | 1.67    | -3.28   | 0.0024*   |
|           | PC2       | 7.00       | 1.68    | 4.17    | 0.00019   |
|           | cos(moon) | 1.32       | 1.68    | 0.79    | 0.44      |
| Intercept | 150.21    | 1.56       | 96.59   | -       |           |
| Peak      | PC1       | -5.47      | 1.58    | -3.47   | 0.0014*   |
|           | PC2       | 9.37       | 1.60    | 5.86    | < 0.0001* |
|           | cos(moon) | 0.24       | 1.60    | 0.15    | 0.88      |

410

### 411 ***Effect of the moon cycle on breeding phenology***

412

413 To further understand if the lunar cycle is associated with the breeding phenology,

414 we performed two statistical tests. To check for unimodal deviation we ran a

415 Rayleigh's test on the moon phases on breeding season start and on peak dates. In

416 both cases we obtained a non-significant p-value (0.27 and 0.08 respectively),

417 indicating that we could not confidently reject the null-hypothesis of the data being

418 uniformly distributed in the circular space. In addition, the outcome of the Hermans-

419 Rasson test for multivariate deviations indicated that the null hypothesis could not be

420 rejected for both start and peak breeding (p-value = 0.38 and 0.21 respectively). To

421 further assess the robustness of our analysis to imperfect assignment of dates we

422 ran both the Rayleigh's and Hermans-Rasson test on 1000 simulated datasets of  
423 dates of start and peak breeding. The outcome is similar to the tests performed on  
424 the originally assigned dates. The p-values of the Rayleigh's test were 0.36 [2.5<sup>th</sup>  
425 and 97.5<sup>th</sup> percentiles: 0.07 ; 0.80] and 0.16 [0.008 ; 0.60] respectively. The p-values  
426 for the Hermans-Rasson test on start and peak breeding were 0.43 [0.05 ; 0.90] and  
427 0.25 [0.011 ; 0.78] respectively. This means that there was no clear pattern between  
428 lunar phases and the start of the breeding season or the peak breeding (Figure 3).

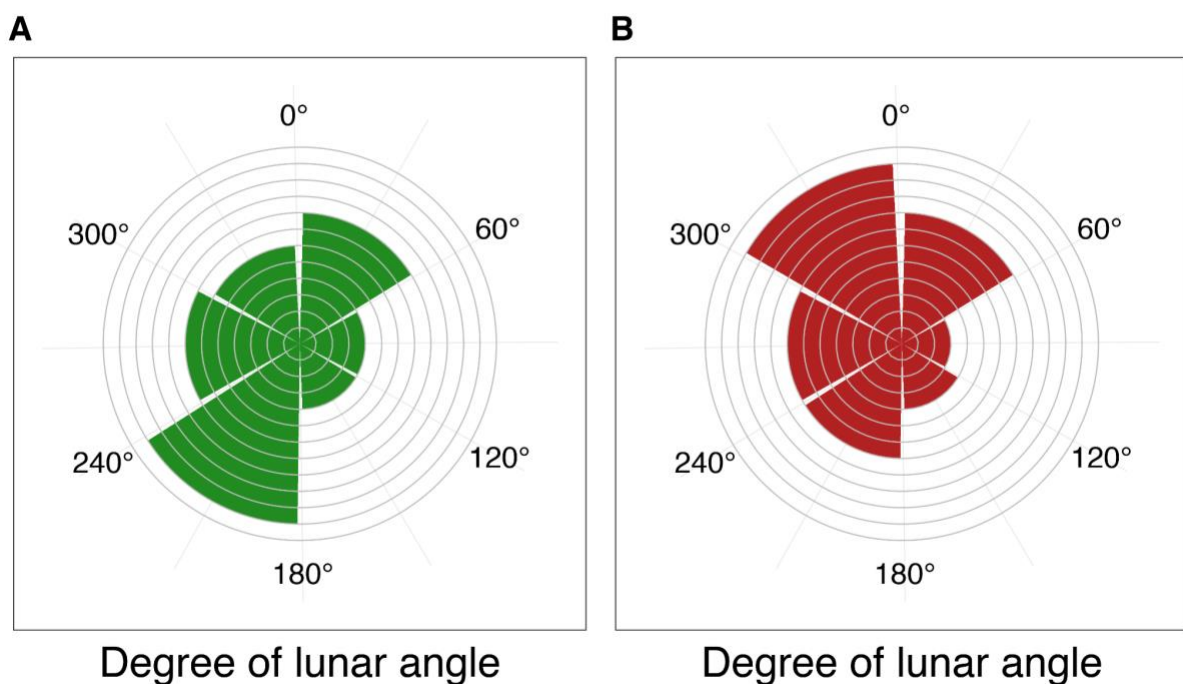

429  
430 **Figure 3.** Circular histogram showing counts of (A) the originally assigned breeding start dates  
431 and (B) the originally assigned peak breeding dates under different lunar phases for the period  
432 1982–2021 (e.g., the breeding season started eight times under a moon phase with a lunar  
433 angle between 0° and 60°). Lunar angles, initially in radians, were back-transformed to  
434 degrees, so that the new moon is at 0° and full moon is at 180°.

435 ***Determinants of individual variation in breeding phenology***

436

437 To better understand if there are among-individual differences in the phenological  
438 response to changing climatic variables, we used a linear mixed model to test for the  
439 effect of climatic variables on the individual breeding start dates (i.e., the date on  
440 which an individual was first captured). We found only a small difference in the  
441 response of breeding phenology to climatic variables among individuals (i.e., low  
442 values for the random effect ID, both on intercept and slopes, Table 3). We found a  
443 strong significant positive effect of PC2 on the breeding dates ( $17.51 \pm 3.27$  SE),  
444 meaning that stronger precipitation and lower minimum spring temperatures are  
445 associated with a delay in the breeding. We also found a significant and strong  
446 negative effect of PC1 ( $-10.14 \pm 2.85$  SE), indicating that colder winter temperatures  
447 and higher SWE are associated with a delay in the breeding. We also found a  
448 significant but weak effect of the cosine of the lunar angle ( $1.57 \pm 0.14$  SE),  
449 suggesting a possible small role of the lunar cycle. Finally, we observed an effect of  
450 sex indicating that males arrived on average earlier than females ( $-1.45 \pm 0.14$  SE)  
451 (Table 3). The 1000 models on the 1000 simulated datasets, ran to assess the  
452 robustness of the analysis to imperfect assignment of arrival dates, showed a similar  
453 outcome to the main model (Table S3).



**Table 3.** Detailed description of the model used to check for the effect of environmental variables on the phenology at the individual level. Sex is included to observe differences between males and females. The response variable ArrivalDate is a vector of dates of arrival at the breeding site for each individual over the study period. PC1 and PC2 are the first two components of the PCA performed on the climatic data. Cos(moon) is the cosine of the lunar angle for the arrival date. ID refers to the identity of each individual, and it is used as a random effect on both intercept and the slopes of PC1 and PC2. Finally, Year is included as a random effect to account for additional unexplained variation that might be caused by sampling variation. The second and third part of the table provide details on the estimates for the fixed and random effects respectively. No p-values are provided for the intercept because this test is not of biological interest.

| Model name       | Variables                                                                                      | Conditional R <sup>2</sup> |         |           |
|------------------|------------------------------------------------------------------------------------------------|----------------------------|---------|-----------|
| Full_model       | ArrivalDate ~ PC1 + PC2 + Sex + cos(moon)<br>+ (1 Year) + (1 ID) + (0 + PC1 ID) + (0 + PC2 ID) | 0.92                       |         |           |
|                  | Effect size                                                                                    | Std. Error                 | t-value | P-value   |
| Intercept        | 147.87                                                                                         | 1.66                       | 89.24   | -         |
| Sex (male)       | -1.45                                                                                          | 0.14                       | -10.44  | < 0.0001* |
| PC1              | -10.14                                                                                         | 2.85                       | -3.56   | 0.0011*   |
| PC2              | 17.51                                                                                          | 3.27                       | 5.36    | < 0.0001* |
| cos(moon)        | 1.57                                                                                           | 0.14                       | 11.08   | < 0.0001* |
| Variance         |                                                                                                |                            |         |           |
| ID (intercept)   | 2.47                                                                                           |                            |         |           |
| ID on PC1        | 2.89                                                                                           |                            |         |           |
| ID on PC2        | 0.58                                                                                           |                            |         |           |
| Year (intercept) | 101.78                                                                                         |                            |         |           |
| Residuals        | 17.73                                                                                          |                            |         |           |

455 ***Repeatability of arrival date***

456

457 In total, 453 females and 1092 males visited the pond over multiple years. The  
458 repeatability value calculated with the originally assigned arrival dates was 0.15  
459 [95% CI 0.08 ; 0.21] for females and 0.12 [95% CI 0.09 ; 0.15] for males. To again  
460 assess the robustness of our analysis we simulated 1000 new datasets with varying  
461 arrival dates and calculated 1000 repeatability values for females and 1000 for  
462 males. We found a mean repeatability value  $r$  of 0.14 [2.5<sup>th</sup> and 97.5<sup>th</sup> percentiles  
463 0.12 ; 0.17] for females and 0.10 [2.5<sup>th</sup> and 97.5<sup>th</sup> percentiles 0.09 ; 0.11] for males.

## 464 **Discussion**

465

466 Our results show that variation in the breeding phenology is strongly associated with  
467 climatic conditions, which vary substantially among years but also show trends  
468 across times. We also found low repeatability values and low variability in individual  
469 responses, suggesting that the genetic component contributing to the observed  
470 variation of individuals in the breeding phenology is weak. Finally, we found  
471 indications of a possibly significant, but weak, effect of the lunar cycle. A signal might  
472 indeed exist, but the climatic variables probably have a stronger effect.

473

474 Our results support the hypothesis of a strong link between the breeding phenology  
475 of high-elevation amphibian populations and climatic conditions. Increasing  
476 temperatures are a key driver of snow melt and ground defrosting, which in turn act  
477 as important environmental cues for toads to initiate migration to their breeding  
478 grounds (Corn & Muths, 2002; Green, 2017). During particularly warm springs, the  
479 snow melts and the ground defrosts earlier, leading to a shift of the onset of breeding  
480 to earlier dates. Our findings on the importance of temperature are in line with  
481 previous studies on *B. bufo* (Reading & Clarke, 1983; Reading, 2003; Tryjanowski et  
482 al., 2003; Arnfield et al., 2012). On the other hand, where past studies have identified  
483 rainfall to be an important trigger for migration in lowland populations (Reading &  
484 Clarke, 1983; Sinsch, 1988; Jarvis et al., 2021), we did not clearly observe this in our  
485 data, as our measure of precipitation included both snow- and rainfall. We found that  
486 a higher amount of precipitation in spring (combined with a decrease of spring  
487 temperature) was associated with a later breeding date. In fact, at low temperatures,  
488 precipitation in the form of snowfall or freezing rain can delay the melting of the snow

489 cover, therefore leading to a delay in the breeding. The observed negative  
490 association between snow water equivalent (SWE) and breeding timing is in line with  
491 the rest of the findings. In fact, SWE depends considerably on temperatures and  
492 precipitation, as well as other aspects such as exposition, and it is a key factor that  
493 influences phenology (Corn, 2003). The very similar trend observed for peak activity  
494 in breeding indicates that both start and peak breeding are influenced mostly in the  
495 same way by the same climatic variables.

496

497 When looking at the individual timing of arrival we still found an important effect on  
498 the breeding phenology of PC1 ( $T_w$  and  $SWE_{Sp/W}$ ) and PC2 ( $T_{Sp}$  and  $Prec_{Sp}$ ) (Table  
499 3). However, we found only non-significant and small among-individual variation in  
500 phenological response to changing climatic conditions (Table 3). As reproduction  
501 happens only once a year in explosive breeders living in temperate zones,  
502 synchronisation in breeding could be key to maximise reproductive output (Ims,  
503 1990). Such an accurate synchronisation can be achieved more easily when all  
504 individuals hibernating close to each other express similar responses to external  
505 cues triggering their migration to the breeding pond, instead of responding  
506 individually in different ways, highlighting once more that the breeding phenology is  
507 mainly driven by climatic conditions.

508       Moreover, the low values of  $r$  (i.e., the upper limit of heritability) that we found  
509 for the timing of arrival show that there is some individual heterogeneity in this trait,  
510 and it could further indicate that there is only a small contribution of the genetic  
511 component to variation in the breeding phenology. This conclusion is in line with  
512 what most studies on amphibian phenology found (Semlitsch et al., 1993; Blaustein  
513 et al., 2001; Parmesan, 2007; While & Uller, 2014; but see Heusser & Ott, 1968;

514 Phillimore et al., 2010). In other species, for instance birds, higher values of  
515 repeatability have been found for migration phenology, a trait linked to breeding.  
516 Franklin et al. (2022) found in their meta-analysis an average value of repeatability of  
517 0.414, while Kürten et al. (2022) found repeatability values above 0.60 for various  
518 traits (but see Clermont et al., 2018; Vaillant et al., 2021 for examples of low  
519 repeatability in birds), but in amphibians that follow an explosive breeding strategy,  
520 the genetic component does not appear to be the main determinant of variation in  
521 breeding phenology. This might be due to either populations being truly able to  
522 respond plastically to changing climatic conditions, and therefore there is no strong  
523 selection on genetic variation in the trait, or there might be little genetic variation in  
524 the population to begin with. Low values of repeatability might also indicate a non-  
525 consistent choice of the hibernation site (and therefore distance to the pond). Not  
526 much is known about hibernation site fidelity in anurans, and future studies should  
527 address this question.

528

529 Finally, we found that on average males tend to arrive earlier than females (Table 3),  
530 similarly to what has been found in lowland populations of *B. bufo* (Loman &  
531 Madsen, 1986; Höglund & Robertson, 1987, 1988; but see Gittins et al., 1980). In  
532 these studies, males, especially bigger ones, were observed to arrive on average  
533 earlier at the breeding pond. Smaller males, on the other hand, were observed  
534 intercepting females on their way to the pond, betting on the fact that the females  
535 would lay the eggs as soon as they arrived at the pond, avoiding competition from  
536 the other bigger males. A more detailed future analysis of body size and its effects  
537 on the timing of migration to the breeding site could confirm this theory also for our  
538 study population.

539 Climate change is leading to on-average increasing temperatures both globally but  
540 also at smaller scales such as in the European Alps (Vitasse et al., 2021) and in  
541 Switzerland (Rebetez & Reinhard, 2008). The start of data collection for this study  
542 (early 1980s) coincides with an important increase of temperatures in Switzerland  
543 (Bundesamt für Umwelt (BAFU), 2020). In fact, each year since the mid-80s, the  
544 deviation from the mean yearly temperature (average calculated over the period  
545 1864–2019) has always been positive (Begert & Frei, 2018). In the Swiss Alps, mean  
546 temperature increased by about 1.7 °C from 1975 to 2004, nearly twice the global  
547 average (Rebetez & Reinhard, 2008). Despite these general trends, we observe at  
548 our study site stable or even decreasing trends in temperatures during the study  
549 period, especially in the second half (Figure 2). Initially, the shift towards earlier  
550 breeding (pre-1993/1996) can be explained by warming temperatures and  
551 decreasing SWE (Figure 2). On the other hand, the absence of a trend in the  
552 breeding dates observed after the mid-1990s (Figure 1) could be explained by a  
553 change in trajectories of winter temperature, which started decreasing around 1990  
554 (Figure 2), as well as of winter and spring SWE, which started increasing around the  
555 same time. These combined changes are acting against the increasing spring  
556 temperature (which has increased until around 2007; Figure 2), therefore slowing  
557 down and ultimately halting the shift towards earlier breeding dates of the toads.

558         While we could expect climate change to act linearly on the shift towards  
559 earlier breeding dates, it is possible that other site-specific conditions prevail at  
560 different temporal and geographical scales, creating an heterogenous mosaic of  
561 climate conditions. An example of this is the influence of the North Atlantic  
562 Oscillation (NAO) on the breeding phenology of amphibians and reptiles in southern  
563 France, where shifts in the breeding phenology in the last forty years were related to

564 variation in the NAO index (Prodon et al., 2020). High elevation habitats can also  
565 show different climates at very small geographical scales (Scherrer & Körner, 2011;  
566 Feldmeier et al., 2020). The phenology of populations experiencing these different  
567 microclimates will therefore not necessarily be affected in the same way (Miller et al.,  
568 2018; Arietta et al., 2020; Turner & Maclean, 2022). In our case, the data on climatic  
569 variables was limited to the 100 metres x 100 metres cell which includes the pond,  
570 and since we do not exactly know where the toads hibernate in the surrounding  
571 landscape, we cannot exclude that they are experiencing different microclimates  
572 compared to the pond and its surrounding area. Hibernating toads have been found  
573 more than 1000 metres away from the breeding site horizontally, and up to almost  
574 400 metres away vertically (Sztatecsny & Schabetsberger, 2005). Since the breeding  
575 pond and surrounding area are often still partially covered by snow during peak  
576 night, the hibernation sites are probably warmer than the breeding site itself.  
577 Differences in microclimates between hibernation sites and breeding site could  
578 further explain individual variation in breeding timing (e.g., arrival at the pond).  
579 Further studies on how the hibernation sites of the toads in this population can affect  
580 the breeding phenology should be conducted.

581

582 Despite the observed stabilisation of the trend of the breeding dates (Figure 1), the  
583 study population appears to experience increased variation in the dates of the start  
584 of the breeding season (Figure S2 and Figure S3). This increased variation could be  
585 explained by extreme weather events whose occurrence is expected to increase  
586 under climate change (Rahmstorf & Coumou, 2011; National Academies of  
587 Sciences, Engineering, and Medicine, 2016). Such unpredictability and extremeness  
588 of environmental conditions could threaten populations if they lead to either

589 excessively early or late breeding, especially in temperate regions. In fact, extreme  
590 early breeding is associated with reduced hibernation periods which can decrease  
591 the body condition in spring (Reading, 2007). Additionally, early breeding can expose  
592 eggs and tadpoles to late frost events (Muir et al., 2014; Bison et al., 2021; Turner &  
593 Maclean, 2022). Delayed breeding can potentially pose a problem as well if the pond  
594 dries out during warm periods in late spring or if juveniles cannot accomplish full  
595 growth before hibernation. Indeed, smaller and younger juveniles are more at risk of  
596 death before and during the first hibernation period (Morin et al., 1990; Sinsch &  
597 Schäfer, 2016). This seems to be compensated in some cases by an accelerated  
598 growth at the larval stage in case of late breeding, but with a cost of reduced  
599 defences against predation (Orizaola et al., 2016). Such riskful situations can have  
600 strong negative effects on individual survival and reproductive output, ultimately  
601 leading to population declines (Reading, 2007; Iler et al., 2021). On the other hand,  
602 at least initially, climate change could lead to longer growing seasons during which  
603 individuals would have the opportunity to gather more energy before the onset of  
604 hibernation (Zani, 2008; Iler et al., 2021), with potentially positive effects at the  
605 population level. Climate change can as well lead to species expanding upward  
606 (Vitasse et al., 2021), with *Bufo bufo* populations observed locally extending their  
607 upper range limit to higher elevations (Lüscher et al., 2016). If moving upwards is not  
608 possible, high-elevation populations adapted to their environments could face local  
609 extirpation (Urban, 2018).



## 610 **Conclusion**

611

612 In this study we showed the important association between climatic variables such  
613 as temperature, snow cover, and precipitation with the breeding phenology of a *Bufo*  
614 *bufo* population living at high elevations. Breeding happens on average around 30  
615 days earlier now compared to four decades ago, and interestingly the shift towards  
616 earlier breeding dates has not been constant, but is better described by two different  
617 trends. After an initial steep advancement until the mid-90s, the trend stabilised. This  
618 is reflected in the trends of the time series of the focal climatic variables, which  
619 explain the observed temporal variation in breeding phenology. The stabilisation in  
620 the trend suggests that there might be spatial heterogeneity in climate change and  
621 its effects, therefore different populations might show different trends in their  
622 breeding phenology. This stabilisation is accompanied by an increased variation in  
623 the dates of the start of the breeding season, with potential consequences for the  
624 population that should be further investigated in the future. To conclude, this 40-year  
625 study is one of the first and most detailed studies on the breeding phenology of  
626 alpine populations of *B. bufo*, and it highlights the influence of changing  
627 environmental conditions on the timing of reproduction.

## 628 **Acknowledgements**

629 We warmly thank all the people involved in data collection and management since  
630 1982 and everybody who facilitated fieldwork during the past 40 years. Capture,  
631 handling and marking of toads were done under an animal welfare permit issued by  
632 the Veterinäramt des Kantons Bern. We also thank the Land Change Science of the  
633 Swiss Federal Research Institute WSL for kindly providing us with the climatic data.  
634

## 635 **Authors contribution**

636 O.L. and B.S. conceived the study. K.G., S.Z., S.A., B.L., D.S., M.T., and H.R.  
637 collected data. O.L. prepared and analysed the data. B.S and A.O. provided  
638 feedback on the analyses. O.L. wrote the paper with input from all authors.  
639

## 640 **Data and script accessibility**

641 Data and scripts for this publication are available on the Zenodo Repository:  
642 <https://doi.org/10.5281/zenodo.7333319>.  
643

## 644 **Supplementary material**

645 Extra tables and figures are available in the Appendix.

646 **Conflict of interest and disclosure**

647 The authors of this preprint declare that they have no financial conflict of interest with  
648 the content of this article.

649

650 **Funding**

651 This project was funded by the Federal Office for the Environment (contract  
652 numbers: 20.0001.PJ/46DBED0F1 and 06.0126-PZ Artenförderung / N494-1379)  
653 and the Stiftung Temperatio.

## 654 **References**

- 655 Agostinelli, C., & Lund, U. (2017). *R package 'circular': Circular statistics*. [https://r-](https://r-forge.r-project.org/projects/circular/)
- 656 [forge.r-project.org/projects/circular/](https://r-forge.r-project.org/projects/circular/)
- 657 Arietta, A. Z. A., Freidenburg, L. K., Urban, M. C., Rodrigues, S. B., Rubinstein, A., &
- 658 Skelly, D. K. (2020). Phenological delay despite warming in wood frog *Rana*
- 659 *sylvatica* reproductive timing: A 20-year study. *Ecography*, *43*(12), 1791–
- 660 1800. <https://doi.org/10.1111/ecog.05297>
- 661 Arnfield, H., Grant, R. A., Monk, C., & Uller, T. (2012). Factors influencing the timing
- 662 of spring migration in common toads (*Bufo bufo*): Timing of spring migration in
- 663 toads. *Journal of Zoology*, *288*(2), 112–118. [https://doi.org/10.1111/j.1469-](https://doi.org/10.1111/j.1469-7998.2012.00933.x)
- 664 [7998.2012.00933.x](https://doi.org/10.1111/j.1469-7998.2012.00933.x)
- 665 Barton, K. (2019). *Multi-Model Inference*.
- 666 Beebee, T. J. C. (1995). Amphibian breeding and climate. *Nature*, *374*(6519), 219–
- 667 220. <https://doi.org/10.1038/374219a0>
- 668 Begert, M., & Frei, C. (2018). Long-term area-mean temperature series for
- 669 Switzerland—Combining homogenized station data and high resolution grid
- 670 data. *International Journal of Climatology*, *38*(6), 2792–2807.
- 671 <https://doi.org/10.1002/joc.5460>
- 672 Bison, M., Yoccoz, N. G., Carlson, B. Z., Klein, G., Laigle, I., Van Reeth, C., Asse,
- 673 D., & Delestrade, A. (2020). Best environmental predictors of breeding
- 674 phenology differ with elevation in a common woodland bird species. *Ecology*
- 675 *and Evolution*, *10*(18), 10219–10229. <https://doi.org/10.1002/ece3.6684>
- 676 Bison, M., Yoccoz, N. G., Carlson, B. Z., Klein, G., Laigle, I., Van Reeth, C., &
- 677 Delestrade, A. (2021). Earlier snowmelt advances breeding phenology of the
- 678 common frog (*Rana temporaria*) but increases the risk of frost exposure and

- 679 wetland drying. *Frontiers in Ecology and Evolution*, 9, 645585.
- 680 <https://doi.org/10.3389/fevo.2021.645585>
- 681 Blaustein, A. R., Belden, L. K., Olson, D. H., Green, D. M., Root, T. L., & Kiesecker,  
682 J. M. (2001). Amphibian breeding and climate change. *Conservation Biology*,  
683 15(6), 1804–1809. <https://doi.org/10.1046/j.1523-1739.2001.00307.x>
- 684 Bundesamt für Umwelt (BAFU). (2020). *Klimawandel in der Schweiz* (p. 105).
- 685 Clermont, J., Réale, D., & Giroux, J.-F. (2018). Plasticity in laying dates of Canada  
686 geese in response to spring phenology. *Ibis*, 160(3), 597–607.
- 687 <https://doi.org/10.1111/ibi.12560>
- 688 Corn, P. S. (2003). Amphibian breeding and climate change: Importance of snow in  
689 the mountains. *Conservation Biology*, 17(2), 622–625.
- 690 <https://doi.org/10.1046/j.1523-1739.2003.02111.x>
- 691 Corn, P. S., & Muths, E. (2002). Variable breeding phenology affects the exposure of  
692 amphibian embryos to ultraviolet radiation. *Ecology*, 83(11), 2958–2963.
- 693 [https://doi.org/10.1890/0012-9658\(2002\)083\[2958:VBPATE\]2.0.CO;2](https://doi.org/10.1890/0012-9658(2002)083[2958:VBPATE]2.0.CO;2)
- 694 Diaz, H. F., Grosjean, M., & Graumlich, L. (2003). Climate variability and change in  
695 high elevation regions: Past, present and future. *Climatic Change*, 59, 1–4.
- 696 [https://doi.org/10.1007/978-94-015-1252-7\\_1](https://doi.org/10.1007/978-94-015-1252-7_1)
- 697 Duellman, W. E., & Trueb, L. (1986). *Biology of Amphibians*. McGraw-Hill Book  
698 Company.
- 699 Falconer, D. S. (1981). *Introduction to quantitative genetics* (2d ed.). Longman.
- 700 Feldmeier, S., Schmidt, B. R., Zimmermann, N. E., Veith, M., Ficetola, G. F., &  
701 Lötters, S. (2020). Shifting aspect or elevation? The climate change response  
702 of ectotherms in a complex mountain topography. *Diversity and Distributions*,  
703 26(11), 1483–1495. <https://doi.org/10.1111/ddi.13146>

- 704 Ficetola, G. F., & Maiorano, L. (2016). Contrasting effects of temperature and  
705 precipitation change on amphibian phenology, abundance and performance.  
706 *Oecologia*, 181(3), 683–693. <https://doi.org/10.1007/s00442-016-3610-9>
- 707 Fitak, R. R., & Johnsen, S. (2017). Bringing the analysis of animal orientation data  
708 full circle: Model-based approaches with maximum likelihood. *Journal of*  
709 *Experimental Biology*, 220(21), 3878–3882.  
710 <https://doi.org/10.1242/jeb.167056>
- 711 Franklin, K. A., Nicoll, M. A. C., Butler, S. J., Norris, K., Ratcliffe, N., Nakagawa, S.,  
712 & Gill, J. A. (2022). Individual repeatability of avian migration phenology: A  
713 systematic review and meta-analysis. *Journal of Animal Ecology*, 91(7),  
714 1416–1430. <https://doi.org/10.1111/1365-2656.13697>
- 715 Garner, T. W. J., Rowcliffe, J. M., & Fisher, M. C. (2011). Climate change,  
716 chytridiomycosis or condition: An experimental test of amphibian survival.  
717 *Global Change Biology*, 17(2), 667–675. [https://doi.org/10.1111/j.1365-  
718 2486.2010.02272.x](https://doi.org/10.1111/j.1365-2486.2010.02272.x)
- 719 Gelman, A. (2008). Scaling regression inputs by dividing by two standard deviations.  
720 *Statistics in Medicine*, 27(15), 2865–2873. <https://doi.org/10.1002/sim.3107>
- 721 Gittins, S. P., Parker, A. G., & Slater, F. M. (1980). Population characteristics of the  
722 common toad (*Bufo bufo*) visiting a breeding site in Mid-Wales. *Journal of*  
723 *Animal Ecology*, 49(1), 161–173. <https://doi.org/10.2307/4281>
- 724 Gotthard, K. (2001). Growth strategies of ectothermic animals in temperate  
725 environments. In D. Atkinson & M. Thorndyke (Eds.), *Environment and animal*  
726 *development: Genes, life histories and plasticity* (pp. 287–304). BIOS  
727 Scientific.
- 728 Grant, R. A., Chadwick, E. A., & Halliday, T. R. (2009). The lunar cycle: A cue for

- 729 amphibian reproductive phenology? *Animal Behaviour*, 78(2), 349–357.
- 730 <https://doi.org/10.1016/j.anbehav.2009.05.007>
- 731 Green, D. M. (2017). Amphibian breeding phenology trends under climate change:  
732 Predicting the past to forecast the future. *Global Change Biology*, 23(2), 646–  
733 656. <https://doi.org/10.1111/gcb.13390>
- 734 Green, T., Das, E., & Green, D. M. (2016). Springtime emergence of overwintering  
735 toads, *Anaxyrus fowleri*, in relation to environmental factors. *Copeia*, 104(2),  
736 393–401. <https://doi.org/10.1643/CE-15-323>
- 737 Grossenbacher, K. (2002). First results of a 20-year-study on common toad *Bufo*  
738 *bufo* in the Swiss Alps. *Biota*, 3(1–2), 43–48.
- 739 Hartel, T., Sas-Kovacs, I., Pernetta, A., & Geltsch, I. (2007). The reproductive  
740 dynamics of temperate amphibians: A review. *North-Western Journal of*  
741 *Zoology*, 3.
- 742 Hemelaar, A. (1988). Age, growth and other population characteristics of *Bufo bufo*  
743 from different latitudes and altitudes. *Journal of Herpetology*, 22(4), 369.  
744 <https://doi.org/10.2307/1564332>
- 745 Heusser, H., & Ott, J. (1968). Sollzeit der Laichwanderung bei der Erdkröte, *Bufo*  
746 *bufo* (L.). *Revue Suisse de Zoologie*, 75, 1005–1022.
- 747 Höglund, J., & Robertson, J. G. M. (1987). Random mating by size in a population of  
748 common toads (*Bufo bufo*). *Amphibia-Reptilia*, 8(4), 321–330.  
749 <https://doi.org/10.1163/156853887X00108>
- 750 Höglund, J., & Robertson, J. G. M. (1988). Chorusing behaviour, a density-  
751 dependent alternative mating strategy in male common toads (*Bufo bufo*).  
752 *Ethology*, 79(4), 324–332. <https://doi.org/10.1111/j.1439-0310.1988.tb00721.x>
- 753 Iler, A. M., CaraDonna, P. J., Forrest, J. R. K., & Post, E. (2021). Demographic

- 754 consequences of phenological shifts in response to climate change. *Annual*  
755 *Review of Ecology, Evolution, and Systematics*, 52(1), annurev-ecolsys-  
756 011921-032939. <https://doi.org/10.1146/annurev-ecolsys-011921-032939>
- 757 Ims, R. A. (1990). The ecology and evolution of reproductive synchrony. *Trends in*  
758 *Ecology & Evolution*, 5(5), 135–140. [https://doi.org/10.1016/0169-](https://doi.org/10.1016/0169-5347(90)90218-3)  
759 [5347\(90\)90218-3](https://doi.org/10.1016/0169-5347(90)90218-3)
- 760 Jara, F. G., Thurman, L. L., Montiglio, P.-O., Sih, A., & Garcia, T. S. (2019).  
761 Warming-induced shifts in amphibian phenology and behavior lead to altered  
762 predator–prey dynamics. *Oecologia*, 189(3), 803–813.  
763 <https://doi.org/10.1007/s00442-019-04360-w>
- 764 Jarvis, L. E., Grant, R. A., & SenGupta, A. (2021). Lunar phase as a cue for  
765 migrations to two species of explosive breeding amphibians—Implications for  
766 conservation. *European Journal of Wildlife Research*, 67(1), 11.  
767 <https://doi.org/10.1007/s10344-020-01453-3>
- 768 Keiler, M., Knight, J., & Harrison, S. (2010). Climate change and geomorphological  
769 hazards in the eastern European Alps. *Philosophical Transactions of the*  
770 *Royal Society A: Mathematical, Physical and Engineering Sciences*,  
771 368(1919), 2461–2479. <https://doi.org/10.1098/rsta.2010.0047>
- 772 Kokko, H. (1999). Competition for early arrival in migratory birds. *Journal of Animal*  
773 *Ecology*, 68(5), 940–950. <https://doi.org/10.1046/j.1365-2656.1999.00343.x>
- 774 Körner, C., & Hiltbrunner, E. (2021). Why is the alpine flora comparatively robust  
775 against climatic warming? *Diversity*, 13(8), 383.  
776 <https://doi.org/10.3390/d13080383>
- 777 Kovar, R., Brabec, M., Bocek, R., & Vita, R. (2009). Spring migration distances of  
778 some Central European amphibian species. *Amphibia-Reptilia*, 30(3), 367–



- 779           378. <https://doi.org/10.1163/156853809788795236>
- 780   Kürten, N., Schmaljohann, H., Bichet, C., Haest, B., Vedder, O., González-Solís, J.,  
781           & Bouwhuis, S. (2022). High individual repeatability of the migratory behaviour  
782           of a long-distance migratory seabird. *Movement Ecology*, 10(1), 5.  
783           <https://doi.org/10.1186/s40462-022-00303-y>
- 784   Kuznetsova, A., Brockhoff, P. B., & Christensen, R. H. B. (2017). lmerTest Package:  
785           Tests in linear mixed effects models. *Journal of Statistical Software*, 82(13),  
786           1–26.
- 787   Landler, L., Ruxton, G. D., & Malkemper, E. P. (2018). Circular data in biology:  
788           Advice for effectively implementing statistical procedures. *Behavioral Ecology*  
789           *and Sociobiology*, 72(8), 128. <https://doi.org/10.1007/s00265-018-2538-y>
- 790   Lazaridis, E. (2014). *lunar: Lunar phase and distance, seasons and other*  
791           *environmental factors* (Version 0.1-04).
- 792   Lessells, C. M., & Boag, P. T. (1987). Unrepeatable repeatabilities: A common  
793           mistake. *The Auk*, 104(1), 116–121. <https://doi.org/10.2307/4087240>
- 794   Loman, J., & Madsen, T. (1986). Reproductive tactics of large and small male toads  
795           *Bufo bufo*. *Oikos*, 46(1), 57. <https://doi.org/10.2307/3565380>
- 796   Lüscher, B., Beer, S., & Grossenbacher, K. (2016). Die Höhenverbreitung der  
797           Erdkröte (*Bufo bufo*) im Berner Oberland (Schweiz) unter sich verändernden  
798           Klimabedingungen. *Zeitschrift für Feldherpetologie*, 23, 47–58.
- 799   Miller, D. A. W., Grant, E. H. C., Muths, E., Amburgey, S. M., Adams, M. J., Joseph,  
800           M. B., Waddle, J. H., Johnson, P. T. J., Ryan, M. E., Schmidt, B. R., Calhoun,  
801           D. L., Davis, C. L., Fisher, R. N., Green, D. M., Hossack, B. R., Rittenhouse,  
802           T. A. G., Walls, S. C., Bailey, L. L., Cruickshank, S. S., ... Sigafus, B. H.  
803           (2018). Quantifying climate sensitivity and climate-driven change in North

- 804 American amphibian communities. *Nature Communications*, 9(1), 3926.  
805 <https://doi.org/10.1038/s41467-018-06157-6>
- 806 Morin, P. J., Lawler, S. P., & Johnson, E. A. (1990). Ecology and breeding phenology  
807 of larval *Hyla andersonii*: The disadvantages of breeding late. *Ecology*, 71(4),  
808 1590–1598. <https://doi.org/10.2307/1938294>
- 809 Muggeo, V. M. R. (2008). Segmented: An R package to fit regression models with  
810 broken-line. *R News*, 8(1), 20–25.
- 811 Muir, A. P., Biek, R., Thomas, R., & Mable, B. K. (2014). Local adaptation with high  
812 gene flow: Temperature parameters drive adaptation to altitude in the  
813 common frog (*Rana temporaria*). *Molecular Ecology*, 23(3), 561–574.  
814 <https://doi.org/10.1111/mec.12624>
- 815 National Academies of Sciences, Engineering, and Medicine. (2016). *Attribution of*  
816 *extreme weather events in the context of climate change*. National Academies  
817 Press.
- 818 Nogués-Bravo, D., Araújo, M. B., Errea, M. P., & Martínez-Rica, J. P. (2007).  
819 Exposure of global mountain systems to climate warming during the 21st  
820 Century. *Global Environmental Change*, 17(3–4), 420–428.  
821 <https://doi.org/10.1016/j.gloenvcha.2006.11.007>
- 822 Nufio, C. R., McGuire, C. R., Bowers, M. D., & Guralnick, R. P. (2010). Grasshopper  
823 community response to climatic change: Variation along an elevational  
824 gradient. *PLoS ONE*, 5(9), 1–11.  
825 <https://doi.org/10.1371/journal.pone.0012977>
- 826 Orizaola, G., Richter-Boix, A., & Laurila, A. (2016). Transgenerational effects and  
827 impact of compensatory responses to changes in breeding phenology on  
828 antipredator defenses. *Ecology*, 97(9), 2470–2478.

- 829 <https://doi.org/10.1002/ecy.1464>
- 830 Oseen, K. L., & Wassersug, R. J. (2002). Environmental factors influencing calling in  
831 sympatric anurans. *Oecologia*, 133(4), 616–625.
- 832 <https://doi.org/10.1007/s00442-002-1067-5>
- 833 Parmesan, C. (2007). Influences of species, latitudes and methodologies on  
834 estimates of phenological response to global warming. *Global Change*  
835 *Biology*, 13(9), 1860–1872. <https://doi.org/10.1111/j.1365-2486.2007.01404.x>
- 836 Parmesan, C., & Yohe, G. (2003). A globally coherent fingerprint of climate change  
837 impacts across natural systems. *Nature*, 421(6918), 37–42.
- 838 <https://doi.org/10.1038/nature01286>
- 839 Phillimore, A. B., Hadfield, J. D., Jones, O. R., & Smithers, R. J. (2010). Differences  
840 in spawning date between populations of common frog reveal local  
841 adaptation. *Proceedings of the National Academy of Sciences*, 107(18),  
842 8292–8297. <https://doi.org/10.1073/pnas.0913792107>
- 843 Pollock, K. H. (1982). A capture-recapture design robust to unequal probability of  
844 capture. *The Journal of Wildlife Management*, 46(3), 752–757.
- 845 <https://doi.org/10.2307/3808568>
- 846 Prodon, R., Geniez, P., Cheylan, M., & Besnard, A. (2020). Amphibian and reptile  
847 phenology: The end of the warming hiatus and the influence of the NAO in the  
848 North Mediterranean. *International Journal of Biometeorology*, 64(3), 423–  
849 432. <https://doi.org/10.1007/s00484-019-01827-6>
- 850 Quinn, J. A., & Wetherington, J. D. (2002). Genetic variability and phenotypic  
851 plasticity in flowering phenology in populations of two grasses. *The Journal of*  
852 *the Torrey Botanical Society*, 129(2), 96–106. <https://doi.org/10.2307/3088723>
- 853 R Core Team. (2020). *R: A language and environment for statistical computing*. R

- 854 *foundation for statistical computing, Vienna, Austria. URL [https://www.R-](https://www.R-project.org/)*  
855 *project.org/.*
- 856 R Studio Team. (2022). *RStudio: Integrated Development for R*. RStudio, PBC.,  
857 Boston, MA.
- 858 Rahmstorf, S., & Coumou, D. (2011). Increase of extreme events in a warming  
859 world. *Proceedings of the National Academy of Sciences*, 108(44), 17905–  
860 17909. <https://doi.org/10.1073/pnas.1101766108>
- 861 Reading, C. J. (2003). The effects of variation in climatic temperature (1980–2001)  
862 on breeding activity and tadpole stage duration in the common toad, *Bufo*  
863 *bufo*. *Science of The Total Environment*, 310(1–3), 231–236.  
864 [https://doi.org/10.1016/S0048-9697\(02\)00643-5](https://doi.org/10.1016/S0048-9697(02)00643-5)
- 865 Reading, C. J. (2007). Linking global warming to amphibian declines through its  
866 effects on female body condition and survivorship. *Oecologia*, 151(1), 125–  
867 131. <https://doi.org/10.1007/s00442-006-0558-1>
- 868 Reading, C. J. (2010). The impact of environmental temperature on larval  
869 development and metamorph body condition in the common toad, *Bufo bufo*.  
870 *Amphibia-Reptilia*, 31(4), 483–488.  
871 <https://doi.org/10.1163/017353710X521537>
- 872 Reading, C. J., & Clarke, R. T. (1983). Male breeding behaviour and mate  
873 acquisition in the common toad, *Bufo bufo*. *Journal of Zoology*, 201(2), 237–  
874 246. <https://doi.org/10.1111/j.1469-7998.1983.tb04273.x>
- 875 Reading, C. J., & Clarke, R. T. (1999). Impacts of climate and density on the duration  
876 of the tadpole stage of the common toad *Bufo bufo*. *Oecologia*, 121(3), 310–  
877 315. <https://doi.org/10.1007/s004420050933>
- 878 Rebetez, M., & Reinhard, M. (2008). Monthly air temperature trends in Switzerland

- 879 1901–2000 and 1975–2004. *Theoretical and Applied Climatology*, 91(1), 27–  
880 34. <https://doi.org/10.1007/s00704-007-0296-2>
- 881 Reinhardt, T., Steinfartz, S., & Weitere, M. (2015). Inter-annual weather variability  
882 can drive the outcome of predator prey match in ponds. *Amphibia-Reptilia*,  
883 36(2), 97–109. <https://doi.org/10.1163/15685381-00002982>
- 884 Scherrer, D., & Körner, C. (2011). Topographically controlled thermal-habitat  
885 differentiation buffers alpine plant diversity against climate warming. *Journal*  
886 *of Biogeography*, 38(2), 406–416. [https://doi.org/10.1111/j.1365-  
887 2699.2010.02407.x](https://doi.org/10.1111/j.1365-2699.2010.02407.x)
- 888 Semlitsch, R. D. (1985). Analysis of climatic factors influencing migrations of the  
889 salamander *Ambystoma talpoideum*. *Copeia*, 1985(2), 477–489.  
890 <https://doi.org/10.2307/1444862>
- 891 Semlitsch, R. D., Scott, D. E., Pechmann, J. H. K., & Gibbons, J. W. (1993).  
892 Phenotypic variation in the arrival time of breeding salamanders: Individual  
893 repeatability and environmental influences. *The Journal of Animal Ecology*,  
894 62(2), 334. <https://doi.org/10.2307/5364>
- 895 Sinsch, U. (1988). Seasonal changes in the migratory behaviour of the toad *Bufo*  
896 *bufo*: Direction and magnitude of movements. *Oecologia*, 76, 390–398.
- 897 Sinsch, U., & Schäfer, A. M. (2016). Density regulation in toad populations (*Epidalea*  
898 *calamita*, *Bufo viridis*) by differential winter survival of juveniles. *Journal of*  
899 *Thermal Biology*, 55, 20–29. <https://doi.org/10.1016/j.jtherbio.2015.11.007>
- 900 Stoffel, M. A., Nakagawa, S., & Schielzeth, H. (2017). RptR: repeatability estimation  
901 and variance decomposition by generalized linear mixed-effects models.  
902 *Methods in Ecology and Evolution*, 8, 1639–1644.  
903 <https://doi.org/doi:10.1111/2041-210X.12797>

- 904 Sztatecsny, M., & Schabetsberger, R. (2005). Into thin air: Vertical migration, body  
905 condition, and quality of terrestrial habitats of alpine common toads, *Bufo*  
906 *bufo*. *Canadian Journal of Zoology*, *83*, 788–796.
- 907 Tang, J., Körner, C., Muraoka, H., Piao, S., Shen, M., Thackeray, S. J., & Yang, X.  
908 (2016). Emerging opportunities and challenges in phenology: A review.  
909 *Ecosphere*, *7*(8), e01436. <https://doi.org/10.1002/ecs2.1436>
- 910 Thompson, L. (2000). Ice core evidence for climate change in the Tropics:  
911 Implications for our future. *Quaternary Science Reviews*, *19*, 19–35.  
912 [https://doi.org/10.1016/S0277-3791\(99\)00052-9](https://doi.org/10.1016/S0277-3791(99)00052-9)
- 913 Thornton, P. E., Running, S. W., & White, M. A. (1997). Generating surfaces of daily  
914 meteorological variables over large regions of complex terrain. *Journal of*  
915 *Hydrology*, *190*(3), 214–251. [https://doi.org/10.1016/S0022-1694\(96\)03128-9](https://doi.org/10.1016/S0022-1694(96)03128-9)
- 916 Todd, B., Scott, D., Pechmann, J., & Gibbons, J. (2011). Climate change correlates  
917 with rapid delays and advancements in reproductive timing in an amphibian  
918 community. *Proceedings. Biological Sciences / The Royal Society*, *278*,  
919 2191–2197. <https://doi.org/10.1098/rspb.2010.1768>
- 920 Tryjanowski, P., Rybacki, M., & Sparks, T. (2003). Changes in the first spawning  
921 dates of common frogs and common toads in western Poland in 1978–2002.  
922 *Annales Zoologici Fennici*, *40*, 459–464.
- 923 Turner, R. K., & Maclean, I. M. D. (2022). Microclimate-driven trends in spring-  
924 emergence phenology in a temperate reptile (*Vipera berus*): Evidence for a  
925 potential “climate trap”? *Ecology and Evolution*, *12*(2), e8623.  
926 <https://doi.org/10.1002/ece3.8623>
- 927 Urban, M. C. (2018). Escalator to extinction. *Proceedings of the National Academy of*  
928 *Sciences*, *115*(47), 11871–11873. <https://doi.org/10.1073/pnas.1817416115>

- 929 Vaillant, J. L., Potti, J., Camacho, C., Canal, D., & Martínez-Padilla, J. (2021). Low  
930 repeatability of breeding events reflects flexibility in reproductive timing in the  
931 pied flycatcher *Ficedula hypoleuca* in Spain. *Ardeola*, 69(1), 21–39.  
932 <https://doi.org/10.13157/arla.69.1.2022.ra2>
- 933 Visser, M. E., & Gienapp, P. (2019). Evolutionary and demographic consequences of  
934 phenological mismatches. *Nature Ecology & Evolution*, 3(6), 879–885.  
935 <https://doi.org/10.1038/s41559-019-0880-8>
- 936 Vitasse, Y., Ursenbacher, S., Klein, G., Bohnenstengel, T., Chittaro, Y., Delestrade,  
937 A., Monnerat, C., Rebetez, M., Rixen, C., Strebel, N., Schmidt, B. R., Wipf, S.,  
938 Wohlgemuth, T., Yoccoz, N. G., & Lenoir, J. (2021). Phenological and  
939 elevational shifts of plants, animals and fungi under climate change in the  
940 European Alps. *Biological Reviews*, 96(5), 1816–1835.  
941 <https://doi.org/10.1111/brv.12727>
- 942 Wells, K. D. (1977). The social behaviour of anuran amphibians. *Animal Behaviour*,  
943 25, 666–693. [https://doi.org/10.1016/0003-3472\(77\)90118-X](https://doi.org/10.1016/0003-3472(77)90118-X)
- 944 While, G. M., & Uller, T. (2014). Quo vadis amphibia? Global warming and breeding  
945 phenology in frogs, toads and salamanders. *Ecography*, 37(10), 921–929.  
946 <https://doi.org/10.1111/ecog.00521>
- 947 Zani, P. A. (2008). Climate change trade-offs in the side-blotched lizard ( *Uta*  
948 *stansburiana* ): Effects of growing-season length and mild temperatures on  
949 winter survival. *Physiological and Biochemical Zoology*, 81(6), 797–809.  
950 <https://doi.org/10.1086/588305>
- 951 Zeileis, A., & Grothendieck, G. (2005). zoo: S3 infrastructure for regular and irregular  
952 time series. *Journal of Statistical Software*, 14, 1–27.  
953 <https://doi.org/10.18637/jss.v014.i06>

954 **Appendix**

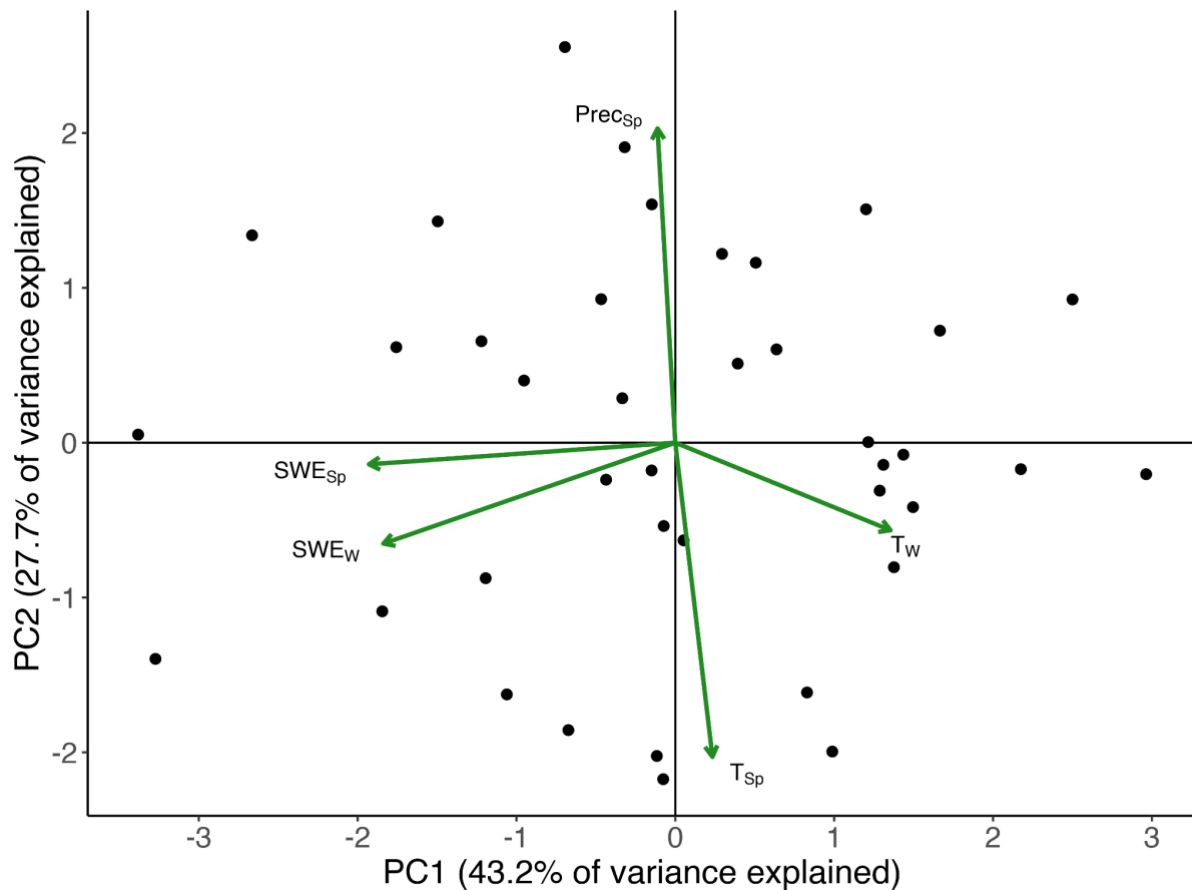

955

956 **Figure S1.** Graphical visualisation of the first two principal components of our principal  
957 component analysis. The points represent the scores over the two axes, while the arrows  
958 represent the loadings of the five environmental variables. The first principal component  
959 explained 43.2% of the variance in the data, while the second principal component explained  
960 27.7%.  $T_{Sp}$  is the average minimum daily spring temperature,  $T_W$  is the average minimum daily  
961 winter temperature,  $Prec_{Sp}$  is the total precipitation in spring,  $SWE_{Sp}$  is the total spring snow  
962 water equivalent and  $SWE_W$  is the total winter snow water equivalent



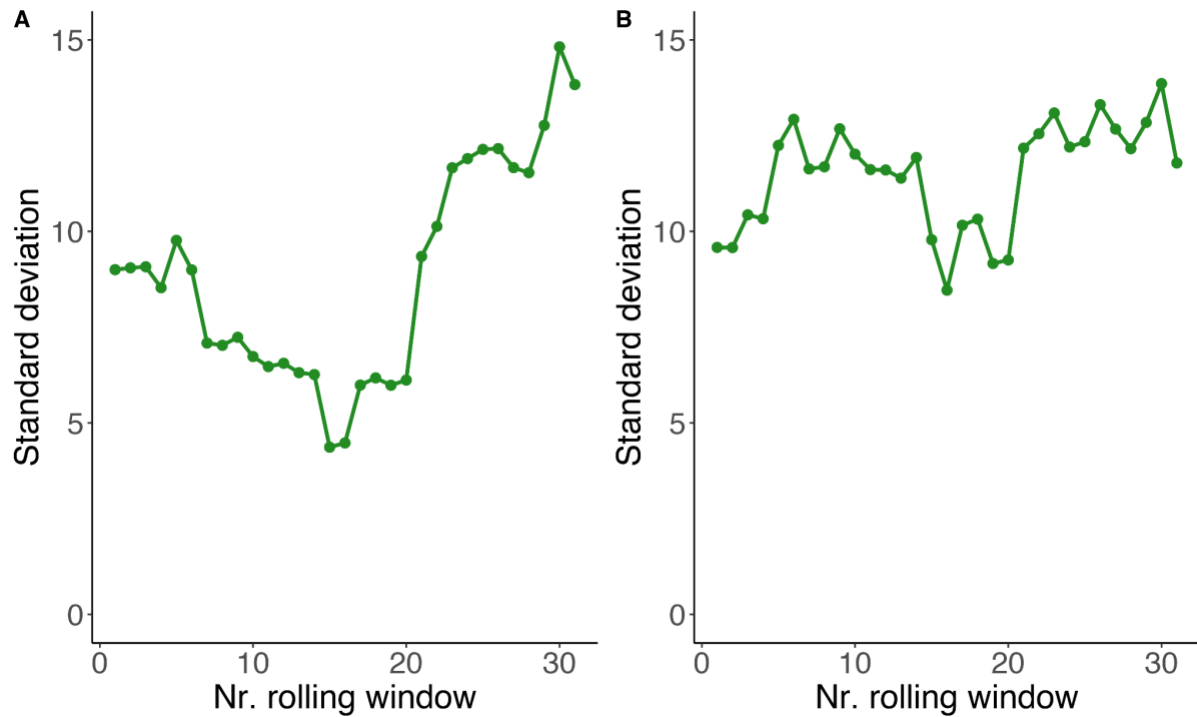

963  
964  
965  
966  
967  
968

**Figure S2.** Mean standard deviation of the residuals of the 1000 piecewise regressions on start of the breeding season (A) and 1000 piecewise regression on peak of the breeding season (B), calculated with a rolling window approach. Window size was 25% of the length of the timeseries (i.e., 10 years out of 40 years, therefore we had 31 windows).

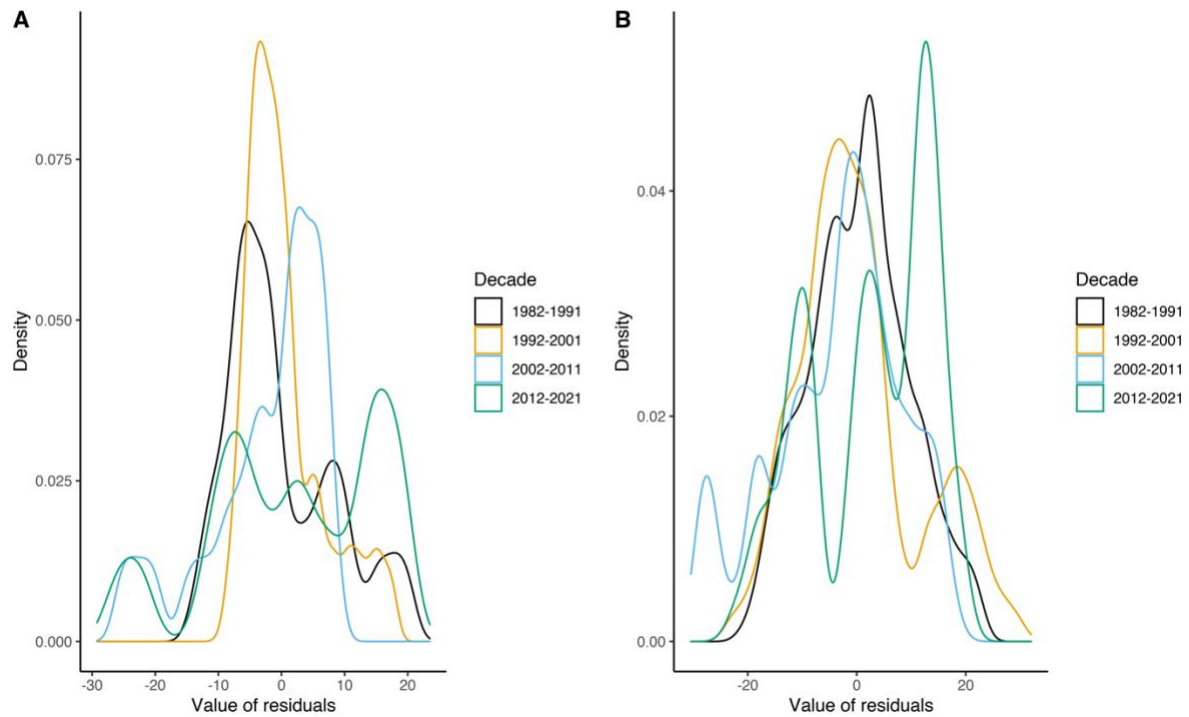

969  
970  
971  
972  
973  
974

**Figure S3.** Distribution of the residuals of the 1000 piecewise regression on start of the breeding season (A) and peak breeding (B). We divided the residuals in four different decades: decade 1 (1982-1991), decade 2 (1992-2001), decade 3 (2002-2011) and decade 4 (2012-2021).

**Table S1.** Summary of the simulated piecewise regressions on the start and peak of the breeding season. For both intercept and slopes we show the estimate, its standard error, and the t-value and p-value associated with it. Moreover, for each parameter we show in square brackets the 2.5<sup>th</sup> and the 97.5<sup>th</sup> percentiles of the values obtained by running 1000 models. Slope1 refers to the segment before the breakpoint and Slope2 refers to the segment after the breakpoint. Asterisks next to the p-values show significance at the 0.05 level. The p-value for Slope2 is NA since standard asymptotics do not apply (Muggeo, 2008). No p-values are provided for the intercept because this test is not of biological interest.

|       | Estimates  | Std. Error                  | t-value               | p-value                   |                                |
|-------|------------|-----------------------------|-----------------------|---------------------------|--------------------------------|
| Start | Intercept  | 166.59<br>[164.24 ; 169.07] | 5.70<br>[5.22 ; 6.17] | 29.29<br>[27.03 ; 31.87]  | -                              |
|       | Slope1     | -3.11<br>[-3.60 ; -2.78]    | 0.95<br>[0.81 ; 1.11] | -3.30<br>[-3.85 ; -2.86]  | 0.0027*<br>[0.0005 ; 0.0069]   |
|       | Slope2     | 0.062<br>[-0.043 ; 0.16]    | 0.23<br>[0.21 ; 0.25] | 0.271<br>[-0.201 ; 0.679] | NA                             |
|       | Breakpoint | 1993                        | 2.30<br>[1.93 ; 2.69] | -                         | < 0.001*<br>[0.00013 ; 0.0020] |
| Peak  | Intercept  | 174.47<br>[167.99 ; 179.56] | 5.52<br>[4.11 ; 6.88] | 32.34<br>[25.78 ; 41.35]  | -                              |
|       | Slope1     | -2.10<br>[-3.10 ; -1.12]    | 0.67<br>[0.26 ; 1.16] | -3.43<br>[-4.69 ; -2.38]  | 0.0046*<br>[< 0.001 ; 0.022]   |
|       | Slope2     | 0.41<br>[-0.11 ; 1.62]      | 0.47<br>[0.25 ; 1.11] | 0.54<br>[-0.40 ; 1.64]    | NA                             |
|       | Breakpoint | 1993 / 1996                 | 3.17<br>[2.52 ; 3.83] | -                         | 0.0023*<br>[0.0005 ; 0.0064]   |

**Table S2.** Summary of the simulated linear regressions on the start and peak of the breeding season. For each variable we show the estimate, its standard error, and the t-value and p-value associated with it. In square brackets we show the 2.5<sup>th</sup> and the 97.5<sup>th</sup> percentile values, obtained by simulating 1000 times the dates and running 1000 models. Asterisks next to the p-value show significance at the 0.05 level. No p-values are provided for the intercept because this test is not of biological interest.

|       |           | Estimates                   | Std. Error            | t-value                   | p-value                            |
|-------|-----------|-----------------------------|-----------------------|---------------------------|------------------------------------|
| Start | Intercept | 138.22<br>[137.54 ; 139.00] | 1.69<br>[1.58 ; 1.80] | 81.93<br>[76.79 ; 87.63]  | -                                  |
|       | PC1       | -5.52<br>[-6.34 ; -4.59]    | 1.73<br>[1.60 ; 1.86] | -3.20<br>[-3.73 ; -2.60]  | 0.0038*<br>[0.00068 ; 0.013]       |
|       | PC2       | 6.99<br>[5.98 ; 7.84]       | 1.75<br>[1.62 ; 1.90] | 4.01<br>[3.35 ; 4.69]     | 0.00048*<br>[< 0.0001* ; 0.0019]   |
|       | cos(moon) | 0.93<br>[-1.34 ; 2.86]      | 1.77<br>[1.63 ; 1.93] | 0.53<br>[-0.72 ; 1.60]    | 0.55<br>[0.11 ; 0.97]              |
| Peak  | Intercept | 150.35<br>[149.41 ; 151.28] | 1.58<br>[1.45 ; 1.70] | 95.43<br>[88.14 ; 104.06] | -                                  |
|       | PC1       | -5.37<br>[-6.42 ; -4.32]    | 1.61<br>[1.48 ; 1.75] | -3.34<br>[-4.07 ; -2.63]  | 0.0032*<br>[0.00025 ; 0.012]       |
|       | PC2       | 9.48<br>[8.38 ; 10.55]      | 1.62<br>[1.48 ; 1.76] | 5.88<br>[4.99 ; 6.81]     | < 0.0001*<br>[< 0.0001 ; < 0.0001] |
|       | cos(moon) | -2.11<br>[-4.11 ; -0.22]    | 1.63<br>[1.49 ; 1.79] | -1.31<br>[-2.61 ; -0.14]  | 0.27<br>[0.013 ; 0.83]             |

976

**Table S3.** Detailed description of the model used to check for the effect of environmental variables on the phenology at the individual level. Sex is included to observe differences between males and females. The response variable ArrivalDate is a vector of dates of arrival at the breeding site for each individual over the study period. PC1 and PC2 are the first two components of the PCA performed on the climatic data. Cos(moon) is the cosine of the lunar angle for the arrival date. ID refers to the identity of each individual, and it is used as a random effect on both intercept and the slopes of PC1 and PC2. Finally, Year is included as a random effect to account for additional unexplained variation that might be caused by sampling variation. The second and third part of the table provide details on the estimates for the fixed and random effects respectively. The values shown are the mean value out of the 1000 models ran on simulated datasets and in square brackets we show the 2.5<sup>th</sup> and the 97.5<sup>th</sup> percentiles of each parameter. No p-values are provided for the intercept because this test is not of biological interest.

| Model name       | Variables                                                                                   | Conditional R <sup>2</sup> |                             |                              |
|------------------|---------------------------------------------------------------------------------------------|----------------------------|-----------------------------|------------------------------|
| Full_model       | ArrivalDate ~ PC1 + PC2 + Sex + cos(moon) + (1 Year) + (1 ID) + (0 + PC1 ID) + (0 + PC2 ID) | 0.883<br>[0.880 ; 0.885]   |                             |                              |
|                  | Effect size                                                                                 | Std. Error                 | t-value                     | P-value                      |
| Intercept        | 145.86<br>[145.77 ; 145.95]                                                                 | 1.68<br>[1.67 ; 1.69]      | 86.84<br>[86.25 ; 87.36]    | -                            |
| Sex (male)       | -1.76<br>[-1.760 ; -1.754]                                                                  | 0.164<br>[0.162 ; 0.166]   | -10.72<br>[-11.29 ; -10.17] | < 0.0001*                    |
| PC1              | -10.04<br>[-10.17 ; -9.91]                                                                  | 2.89<br>[2.87 ; 2.91]      | -3.47<br>[-3.53 ; -3.42]    | 0.0014*<br>[0.0012 ; 0.0016] |
| PC2              | 16.74<br>[16.56 ; 16.92]                                                                    | 3.32<br>[3.29 ; 3.34]      | 5.05<br>[4.99 ; 5.10]       | < 0.0001*                    |
| cos(moon)        | 1.06<br>[0.84 ; 1.29]                                                                       | 0.147<br>[0.145 ; 0.148]   | 7.26<br>[5.70 ; 8.76]       | < 0.0001*                    |
| Variance         |                                                                                             |                            |                             |                              |
| ID (intercept)   | 3.06 [2.77 ; 3.36]                                                                          |                            |                             |                              |
| ID on PC1        | 1.96 [1.23 ; 2.72]                                                                          |                            |                             |                              |
| ID on PC2        | 0.32 [0.00 ; 1.19]                                                                          |                            |                             |                              |
| Year (intercept) | 104.37 [103.04 ; 105.82]                                                                    |                            |                             |                              |
| Residuals        | 26.08 [25.53 ; 26.60]                                                                       |                            |                             |                              |

**Table S4.** Summary of the piecewise regressions on the five focal environmental variables. *MinT\_Spring* is the average minimum daily spring temperature, *MinT\_Winter* is the average minimum daily winter temperature, *Prec\_Spring* is the total precipitation in spring, *SWE\_Spring* is the total spring snow water equivalent and *SWE\_Winter* is the total winter snow water equivalent. We rescaled year to obtain more intuitive intercept estimates (year 1980 = 0). *Slope1* refers to the segment before the breakpoint and *Slope2* refers to the segment after the breakpoint. We also show the statistics associated with the identified breakpoint. Asterisks next to the p-values show significance at the 0.05 level. The p-value for *Slope2* is NA since standard asymptotics do not apply (Muggeo, 2008). No p-values are provided for the intercept because this test is not of biological interest.

|             |            | Estimates | Std. Error | t-value | p-value |
|-------------|------------|-----------|------------|---------|---------|
| MinT_Spring | Intercept  | -0.82     | 0.30       | -2.76   | -       |
|             | Slope1     | 0.07      | 0.02       | 3.33    | 0.002*  |
|             | Slope2     | -0.05     | 0.05       | -0.87   | NA      |
|             | Breakpoint | 2007      | 4.60       | -1.92   | 0.06    |
| MinT_Winter | Intercept  | -8.88     | 0.80       | -11.10  | -       |
|             | Slope1     | 0.24      | 0.14       | 1.76    | 0.09    |
|             | Slope2     | -0.03     | 0.03       | -1.07   | NA      |
|             | Breakpoint | 1990      | 3.56       | -1.05   | 0.30    |
| Prec_Spring | Intercept  | 41.35     | 6.90       | 6.00    | -       |
|             | Slope1     | 2.26      | 1.91       | 1.18    | 0.24    |
|             | Slope2     | -0.30     | 0.18       | -1.68   | NA      |
|             | Breakpoint | 1986      | 3.91       | -1.51   | 0.14    |
| SWE_Spring  | Intercept  | 3654.0    | 707.3      | 5.17    | -       |
|             | Slope1     | -219.20   | 132.49     | -1.65   | 0.11    |
|             | Slope2     | 37.68     | 24.17      | 1.56    | NA      |
|             | Breakpoint | 1990      | 3.55       | 2.23    | 0.03*   |
| SWE_Winter  | Intercept  | 2643.3    | 511.4      | 5.17    | -       |
|             | Slope1     | -156.42   | 107.41     | -1.46   | 0.15    |
|             | Slope2     | 28.31     | 15.93      | 1.78    | NA      |
|             | Breakpoint | 1989      | 3.62       | 1.88    | 0.07    |

977

978

**Table S5.** Details of the five principal components. For each principal component we report its standard deviation, the proportion of variance explained and the cumulative proportion of this variance. In our linear regression we kept the first two principal components as their standard deviation is >1 (i.e. their eigenvalue >1) and combined they explain >70 % of the variance.

|                        | PC1  | PC2  | PC3  | PC4  | PC5  |
|------------------------|------|------|------|------|------|
| Standard deviation     | 1.47 | 1.18 | 0.83 | 0.82 | 0.33 |
| Proportion of variance | 0.43 | 0.28 | 0.14 | 0.13 | 0.02 |
| Cumulative proportion  | 0.43 | 0.71 | 0.85 | 0.98 | 1.00 |

979

980

981

**Table S6.** Loadings of the five original environmental variables from which the five principal components are constructed. *MinT\_Spring* is the average minimum daily spring temperature, *MinT\_Winter* is the average minimum daily winter temperature, *Prec\_Spring* is the total precipitation in spring, *SWE\_Spring* is the total spring snow water equivalent and *SWE\_Winter* is the total winter snow water equivalent. PC1 is mainly driven by *MinT\_Winter*, *SWE\_Spring* and *SWE\_Winter*, while PC2 mostly by *MinT\_Spring* and *Prec\_Spring*.

|             | PC1   | PC2   | PC3  | PC4   | PC5   |
|-------------|-------|-------|------|-------|-------|
| MinT_Spring | 0.08  | -0.68 | 0.33 | -0.65 | 0.09  |
| MinT_Winter | 0.45  | -0.19 | 0.64 | 0.58  | 0.07  |
| Prec_Spring | -0.04 | 0.68  | 0.60 | -0.41 | -0.06 |
| SWE_Spring  | -0.64 | -0.05 | 0.20 | 0.17  | 0.72  |
| SWE_Winter  | -0.61 | -0.22 | 0.27 | 0.19  | -0.69 |

982
